# Supplementary material for: Identification and characterization of critical genes associated with tamoxifen resistance in breast cancer
Source: PeerJ journal article supplement (doi:10.7717/peerj.10468), 2020-12-04
Supplement: Raw_data.zip [file DEG.xlsx]

## Sheet: Responder - Nonresponder
ID_REF	Gene	logFC	AveExpr	t	P.Value	adj.P.Val	B
236123_at	WNT2B	5.81635	7.30965	60.0295	4.81655e-14	2.63345e-09	17.9916
201952_at	ALCAM	-5.39302	6.52658	-38.7322	3.66339e-12	1.00148e-07	16.2671
218729_at	LXN	-4.03197	10.335	-36.1342	7.26522e-12	1.00187e-07	15.9038
238512_at	WNT2B	5.31472	6.31017	36.1018	7.32961e-12	1.00187e-07	15.899
211144_x_at	TARP /// TRGC2 /// TRGV9	-5.16044	7.63606	-32.403	2.12534e-11	2.32406e-07	15.2822
216920_s_at	TARP /// TRGC2 /// TRGV9	-5.40876	7.163	-30.6389	3.68588e-11	3.17189e-07	14.9389
217838_s_at	EVL	5.29222	7.26127	30.3383	4.06094e-11	3.17189e-07	14.8768
212960_at	TBC1D9	2.33057	7.39477	27.3831	1.11075e-10	6.91224e-07	14.2023
218574_s_at	LMCD1	2.86153	6.73112	27.3159	1.13782e-10	6.91224e-07	14.1856
204971_at	CSTA	3.67537	8.31385	26.59	1.48166e-10	8.10096e-07	13.9995
202429_s_at	PPP3CA	-2.88308	7.81547	-26.0413	1.81742e-10	9.03338e-07	13.8532
221698_s_at	CLEC7A	-2.60852	5.64805	-24.9038	2.81398e-10	1.28212e-06	13.5332
206458_s_at	WNT2B	3.1213	5.53503	24.3814	3.46227e-10	1.45615e-06	13.3781
212956_at	TBC1D9	2.5094	8.89414	23.4353	5.09681e-10	1.99048e-06	13.0836
230238_at	SOWAHA	-2.1897	4.52877	-23.1303	5.79198e-10	2.02224e-06	12.9846
219795_at	SLC6A14	3.39098	4.39887	23.0794	5.91785e-10	2.02224e-06	12.9679
206488_s_at	CD36	-3.63563	5.33847	-22.9229	6.32405e-10	2.03393e-06	12.9162
231802_at	CLEC3A	-2.53433	4.77316	-22.7529	6.80049e-10	2.04228e-06	12.8594
201578_at	PODXL	2.19569	7.12117	22.6535	7.09708e-10	2.04228e-06	12.8259
212158_at	SDC2	-2.58311	4.59213	-22.3273	8.1753e-10	2.23492e-06	12.7143
200907_s_at	PALLD	-2.78106	8.84419	-21.7943	1.03451e-09	2.66517e-06	12.5266
204734_at	KRT15	-3.1523	5.66808	-21.7132	1.07281e-09	2.66517e-06	12.4974
209813_x_at	TARP /// TRGC2 /// TRGV9	-5.18635	7.49475	-21.6151	1.12115e-09	2.66517e-06	12.4619
201754_at	COX6C	2.16313	12.9146	21.5159	1.1725e-09	2.6711e-06	12.4258
217853_at	TNS3	-2.22646	5.12462	-21.3561	1.2607e-09	2.73585e-06	12.3671
201963_at	ACSL1	-3.12908	5.2122	-21.2642	1.31476e-09	2.73585e-06	12.333
215034_s_at	TM4SF1	-2.97178	4.53266	-21.1432	1.38985e-09	2.73585e-06	12.2878
209386_at	TM4SF1	-3.07694	6.10805	-21.1257	1.40107e-09	2.73585e-06	12.2812
1553226_at	LINC00052	1.87954	4.56403	21.0367	1.45976e-09	2.75216e-06	12.2477
201666_at	TIMP1	2.21417	6.95086	20.8129	1.61977e-09	2.86595e-06	12.1625
209522_s_at	CRAT	-2.25593	5.60104	-20.8061	1.62496e-09	2.86595e-06	12.1599
225548_at	SHROOM3	-2.2	7.34239	-20.529	1.85113e-09	3.02956e-06	12.0525
207275_s_at	ACSL1	-2.2449	5.85796	-20.4067	1.96174e-09	3.02956e-06	12.0044
207761_s_at	METTL7A	-2.72477	7.34185	-20.3919	1.9756e-09	3.02956e-06	11.9986
209343_at	EFHD1	-1.85419	8.29723	-20.3591	2.00672e-09	3.02956e-06	11.9856
229258_at	KIF12	-2.07537	7.17269	-20.2594	2.10469e-09	3.02956e-06	11.946
218692_at	SYBU	-4.12078	5.81573	-20.24	2.12444e-09	3.02956e-06	11.9382
215691_x_at	HSPB11	-2.08391	7.63902	-20.2044	2.161e-09	3.02956e-06	11.924
229160_at	MUM1L1	-3.07362	4.32479	-19.619	2.87443e-09	3.77121e-06	11.6847
225273_at	WWC3	-2.80036	6.88155	-19.5926	2.91228e-09	3.77121e-06	11.6737
200906_s_at	PALLD	-2.5972	7.25983	-19.5902	2.91566e-09	3.77121e-06	11.6727
242660_at	MALRD1	2.20329	4.67882	19.5557	2.96593e-09	3.77121e-06	11.6582
200897_s_at	PALLD	-2.58476	9.05704	-19.4429	3.13712e-09	3.89823e-06	11.6107
210640_s_at	GPER1	2.03214	7.88624	19.3281	3.32241e-09	3.96899e-06	11.562
215806_x_at	TARP /// TRGC2 /// TRGV9	-5.52735	7.28573	-19.318	3.33925e-09	3.96899e-06	11.5577
220448_at	KCNK12	-1.93712	4.24985	-19.0927	3.74116e-09	4.3014e-06	11.4608
209267_s_at	SLC39A8	-2.22817	6.79674	-19.0743	3.77626e-09	4.3014e-06	11.4528
228284_at	TLE1	2.67737	5.78059	18.9603	4.00192e-09	4.38998e-06	11.4032
215145_s_at	CNTNAP2	-2.60122	5.22564	-18.9491	4.02492e-09	4.38998e-06	11.3982
209398_at	HIST1H1C	2.38785	8.02338	18.9154	4.09491e-09	4.38998e-06	11.3835
216252_x_at	FAS	-2.49888	5.76181	-18.6608	4.66847e-09	4.90862e-06	11.2707
206459_s_at	WNT2B	3.4348	6.23142	18.3221	5.57315e-09	5.74928e-06	11.1173
201116_s_at	CPE	1.92274	6.60131	18.193	5.96706e-09	6.04165e-06	11.0578
219090_at	SLC24A3	2.3825	6.01618	18.0473	6.44901e-09	6.19686e-06	10.99
204933_s_at	TNFRSF11B	3.59535	5.31257	18.0182	6.55022e-09	6.19686e-06	10.9764
243200_at	RP11-369C8.1	-2.64107	4.37819	-18.0159	6.55833e-09	6.19686e-06	10.9753
200974_at	ACTA2	-3.07111	7.88744	-18.0116	6.57372e-09	6.19686e-06	10.9733
223721_s_at	DNAJC12	2.02791	6.35368	17.7618	7.52228e-09	6.97086e-06	10.855
223551_at	PKIB	-3.32806	5.41113	-17.4823	8.76538e-09	7.89824e-06	10.72
202084_s_at	SEC14L1	-1.77275	8.87306	-17.4727	8.81193e-09	7.89824e-06	10.7153
202949_s_at	FHL2	-2.40011	7.85766	-17.3662	9.34685e-09	8.2136e-06	10.6631
210663_s_at	KYNU	1.68992	8.62832	17.3437	9.46424e-09	8.2136e-06	10.652
219300_s_at	CNTNAP2	-2.11151	5.72438	-17.0427	1.12024e-08	9.57014e-06	10.5019
1560850_at	LOC101926959	2.00454	4.23657	16.8537	1.24711e-08	1.01278e-05	10.4059
219250_s_at	FLRT3	2.63354	5.12867	16.8422	1.25531e-08	1.01278e-05	10.4
218677_at	S100A14	-1.72651	9.31723	-16.8264	1.26667e-08	1.01278e-05	10.3919
202082_s_at	SEC14L1	-1.7464	7.6213	-16.7949	1.28972e-08	1.01278e-05	10.3757
1555460_a_at	SLC39A6	2.08127	9.52896	16.785	1.29711e-08	1.01278e-05	10.3706
213310_at	AGO2 /// CASC7 /// CASC7 /// DQ574852	-1.55402	6.16838	-16.7662	1.3111e-08	1.01278e-05	10.361
219301_s_at	CNTNAP2	-1.86398	4.45933	-16.7608	1.31518e-08	1.01278e-05	10.3582
201150_s_at	TIMP3	3.38695	7.4885	16.6072	1.43688e-08	1.09113e-05	10.2785
217388_s_at	KYNU	1.76294	9.11186	16.5002	1.52893e-08	1.14513e-05	10.2225
202088_at	SLC39A6	1.85625	10.5602	16.3966	1.62426e-08	1.1852e-05	10.1678
209181_s_at	RABGGTB /// SNORD45A /// SNORD45B /// SNORD45C	-1.47491	7.56555	-16.3721	1.64779e-08	1.18543e-05	10.1548
202425_x_at	PPP3CA	-2.08282	8.59112	-16.3405	1.67862e-08	1.19193e-05	10.138
206632_s_at	APOBEC3B	1.70159	5.12402	16.3083	1.71074e-08	1.19916e-05	10.1208
228010_at	PPP2R2C	-1.60659	6.66999	-16.0931	1.94322e-08	1.33769e-05	10.005
219268_at	ETNK2	-2.42017	6.69051	-16.081	1.9573e-08	1.33769e-05	9.99846
200923_at	LGALS3BP	3.22224	6.03917	16.0119	2.03982e-08	1.3658e-05	9.96081
201951_at	ALCAM	-4.63167	6.11147	-15.9909	2.06565e-08	1.3658e-05	9.94933
46665_at	SEMA4C	2.40577	9.24854	15.9847	2.07337e-08	1.3658e-05	9.94593
219520_s_at	WWC3	-2.34285	7.02196	-15.791	2.33023e-08	1.51673e-05	9.83913
209387_s_at	TM4SF1	-1.55303	5.2065	-15.7372	2.40763e-08	1.54867e-05	9.80918
202457_s_at	PPP3CA	-2.3966	8.81275	-15.6005	2.6173e-08	1.66396e-05	9.73249
200975_at	PPT1	-1.86787	10.1825	-15.5029	2.77926e-08	1.74662e-05	9.67722
206440_at	LIN7A	1.8491	5.60947	15.4703	2.83575e-08	1.76187e-05	9.65868
202083_s_at	SEC14L1	-2.12764	5.87006	-15.4368	2.89512e-08	1.77855e-05	9.63957
203882_at	IRF9	2.95189	5.99732	15.3927	2.97544e-08	1.80758e-05	9.61431
202269_x_at	GBP1	-1.877	4.81552	-15.2793	3.19335e-08	1.90044e-05	9.54898
204542_at	ST6GALNAC2	1.55304	6.7165	15.2771	3.19782e-08	1.90044e-05	9.54769
228832_at	FLJ20021	-1.7833	6.90375	-15.2076	3.34006e-08	1.96363e-05	9.50739
200872_at	S100A10	-1.62946	11.2357	-15.1543	3.45409e-08	2.00907e-05	9.47627
203960_s_at	HSPB11	-1.94908	6.43392	-15.0017	3.80433e-08	2.18949e-05	9.38656
203675_at	NUCB2	1.73841	7.61781	14.8694	4.13975e-08	2.34634e-05	9.30786
208873_s_at	REEP5	-1.38868	8.83243	-14.8608	4.16268e-08	2.34634e-05	9.30271
204597_x_at	STC1	1.43389	6.96479	14.7908	4.35436e-08	2.42933e-05	9.26069
203999_at	SYT1	1.82663	5.71994	14.7553	4.45502e-08	2.43697e-05	9.23934
214356_s_at	KIAA0368	-1.45194	6.48136	-14.7493	4.47226e-08	2.43697e-05	9.23573
203217_s_at	ST3GAL5	-1.46341	6.27367	-14.7259	4.54059e-08	2.43697e-05	9.22155
201162_at	IGFBP7	-1.40717	5.9912	-14.7158	4.57032e-08	2.43697e-05	9.21545
212154_at	SDC2	-2.98999	5.79235	-14.7089	4.59091e-08	2.43697e-05	9.21125
201105_at	LGALS1	1.79606	6.93442	14.6789	4.68093e-08	2.46087e-05	9.19308
211829_s_at	GPER1	2.43077	6.75258	14.5808	4.98973e-08	2.59822e-05	9.13324
222557_at	STMN3	1.71483	7.38691	14.5103	5.22529e-08	2.67696e-05	9.08996
209278_s_at	TFPI2	-2.00308	6.2966	-14.5063	5.23886e-08	2.67696e-05	9.08752
238439_at	ANKRD22	-3.65153	5.27274	-14.4801	5.3299e-08	2.69826e-05	9.07134
211998_at	H3F3A /// H3F3B /// MIR4738	1.2604	7.87422	14.3757	5.70935e-08	2.82669e-05	9.00668
203222_s_at	TLE1	2.75591	5.92853	14.3579	5.77717e-08	2.82669e-05	8.99557
203221_at	TLE1	2.85541	7.27062	14.3514	5.80193e-08	2.82669e-05	8.99154
209173_at	AGR2	-2.29271	9.61777	-14.3484	5.81361e-08	2.82669e-05	8.98965
225591_at	FBXO25	-2.21214	7.17798	-14.341	5.84208e-08	2.82669e-05	8.98505
220624_s_at	ELF5	-1.79721	4.75352	-14.324	5.90834e-08	2.83367e-05	8.97443
233825_s_at	CD99L2	1.85054	6.23012	14.2925	6.03344e-08	2.86851e-05	8.95468
230360_at	GLDN	1.30492	4.85146	14.2749	6.10449e-08	2.87727e-05	8.94365
1556551_s_at	SLC39A6	1.94933	9.62129	14.24	6.24815e-08	2.91981e-05	8.92171
207935_s_at	KRT13	-3.24438	5.68294	-14.185	6.48208e-08	3.00345e-05	8.88701
212203_x_at	IFITM3	1.27345	9.11197	14.1631	6.57799e-08	3.02228e-05	8.87314
224823_at	MYLK	-3.34062	4.65465	-14.0996	6.86468e-08	3.12772e-05	8.83281
220744_s_at	IFT122 /// LOC101927266	2.5926	8.28735	14.0665	7.01942e-08	3.17179e-05	8.81172
204794_at	DUSP2	-1.49159	6.59881	-14.0067	7.30911e-08	3.27562e-05	8.77343
1555801_s_at	ZNF385B	-1.83663	3.7897	-13.9052	7.8312e-08	3.48107e-05	8.70801
225673_at	MYADM	-1.65714	8.23655	-13.8199	8.30142e-08	3.66033e-05	8.65262
204780_s_at	FAS	-2.04804	6.42589	-13.7769	8.55037e-08	3.73993e-05	8.62452
227741_at	PTPLB	-1.51306	7.22187	-13.741	8.76405e-08	3.80297e-05	8.60104
212428_at	KIAA0368	-1.45367	6.92012	-13.71	8.95378e-08	3.85471e-05	8.58064
229043_at	PAPD5	-2.14739	5.83824	-13.6661	9.22942e-08	3.94233e-05	8.55176
219587_at	TTC12	-2.04329	5.13792	-13.6454	9.36283e-08	3.96832e-05	8.53807
204385_at	KYNU	1.66127	8.78499	13.6299	9.46393e-08	3.98031e-05	8.52783
213629_x_at	MT1F	1.36679	6.9979	13.5875	9.74749e-08	4.06827e-05	8.49967
225601_at	HMGB3	1.8628	7.89133	13.5758	9.82737e-08	4.07054e-05	8.49188
242979_at	IRS1	1.98506	4.34205	13.4829	1.04868e-07	4.31102e-05	8.42983
213624_at	SMPDL3A	-2.86346	5.78681	-13.4645	1.06224e-07	4.33418e-05	8.41754
226223_at	PAWR	-1.70111	7.53541	-13.4518	1.07178e-07	4.34073e-05	8.40899
200965_s_at	ABLIM1	-1.65286	6.04425	-13.4074	1.10584e-07	4.42239e-05	8.37905
223427_s_at	EPB41L4B	-1.48555	5.34148	-13.3361	1.16293e-07	4.60747e-05	8.33083
214005_at	GGCX	1.41753	5.67003	13.2669	1.22145e-07	4.79373e-05	8.28374
201170_s_at	BHLHE40	-1.31751	7.70173	-13.26	1.22748e-07	4.79373e-05	8.27901
203085_s_at	TGFB1	2.37523	5.65394	13.2451	1.2406e-07	4.81061e-05	8.26881
201397_at	PHGDH	-1.17964	8.8476	-13.1695	1.30947e-07	5.03321e-05	8.2169
202089_s_at	SLC39A6	1.76063	10.1966	13.1621	1.31641e-07	5.03321e-05	8.21182
201601_x_at	IFITM1 /// IFITM2	1.43038	5.28777	13.1258	1.35117e-07	5.11779e-05	8.18675
214440_at	NAT1	1.87569	6.76494	13.1195	1.35726e-07	5.11779e-05	8.18243
218995_s_at	EDN1	-2.00599	6.72334	-13.0703	1.40622e-07	5.26611e-05	8.14832
210510_s_at	NRP1	-1.78003	6.00644	-13.0522	1.42468e-07	5.29892e-05	8.13577
212040_at	TGOLN2	1.23294	5.37843	13.0274	1.45042e-07	5.35823e-05	8.11851
220625_s_at	ELF5	-2.70566	5.41549	-12.9972	1.48253e-07	5.44011e-05	8.0974
207618_s_at	BCS1L	-1.57551	7.35781	-12.9389	1.54661e-07	5.6374e-05	8.05659
203910_at	ARHGAP29	-1.25207	7.805	-12.917	1.57153e-07	5.69028e-05	8.04117
217728_at	S100A6	-2.21363	9.37216	-12.9068	1.58327e-07	5.6951e-05	8.03398
201921_at	GNG10	-1.19196	7.85856	-12.8682	1.6285e-07	5.78171e-05	8.00677
212235_at	PLXND1	1.93323	6.7859	12.8375	1.66559e-07	5.87524e-05	7.98501
229800_at	DCLK1	1.40034	3.62565	12.7824	1.73431e-07	6.07841e-05	7.94592
227276_at	PLXDC2	1.22071	4.67267	12.7704	1.74974e-07	6.09343e-05	7.93735
213943_at	TWIST1	2.07309	5.57875	12.699	1.84433e-07	6.3822e-05	7.88637
212010_s_at	CDV3	-1.69288	8.52518	-12.6629	1.89441e-07	6.51427e-05	7.8604
233141_s_at	ST7L	1.45841	4.88199	12.6309	1.94003e-07	6.62944e-05	7.83733
204781_s_at	FAS	-1.65317	5.87913	-12.5993	1.98612e-07	6.74478e-05	7.81455
210987_x_at	TPM1	-1.48658	8.73966	-12.584	2.00895e-07	6.7802e-05	7.80346
204041_at	MAOB	1.47917	6.03618	12.5615	2.043e-07	6.85282e-05	7.78714
219039_at	SEMA4C	1.69143	7.2979	12.4878	2.15893e-07	7.19754e-05	7.73352
229476_s_at	THRSP	-1.79289	4.78003	-12.4613	2.20243e-07	7.27337e-05	7.71412
219142_at	RASL11B	-1.58314	5.53683	-12.4578	2.20828e-07	7.27337e-05	7.71154
205225_at	ESR1	1.08818	8.05715	12.4307	2.25379e-07	7.37459e-05	7.6917
200911_s_at	TACC1	-2.02296	6.79538	-12.4235	2.26599e-07	7.37459e-05	7.68644
228564_at	LINC01116	1.38132	5.00429	12.3421	2.41009e-07	7.77929e-05	7.62641
225946_at	RASSF8	1.57826	5.04484	12.3373	2.4188e-07	7.77929e-05	7.62289
212660_at	JADE2	1.28312	6.10549	12.3203	2.45026e-07	7.78931e-05	7.6103
208864_s_at	TXN	-1.17395	9.21187	-12.3202	2.45041e-07	7.78931e-05	7.61024
212765_at	CAMSAP2	-1.639	7.70879	-12.3102	2.4691e-07	7.80337e-05	7.60283
205463_s_at	PDGFA	1.56637	5.25843	12.2861	2.51487e-07	7.90233e-05	7.58492
215771_x_at	RET	1.19837	7.60229	12.2416	2.60175e-07	8.12861e-05	7.55179
43427_at	ACACB	2.09391	5.81703	12.2289	2.62724e-07	8.1616e-05	7.54227
201690_s_at	TPD52	-1.5397	9.2165	-12.2128	2.65978e-07	8.19421e-05	7.53025
201147_s_at	TIMP3	2.31815	8.72171	12.2052	2.67534e-07	8.19421e-05	7.52456
223574_x_at	PPP2R2C	-1.25726	7.43009	-12.2016	2.6827e-07	8.19421e-05	7.52188
222379_at	KCNE4	1.18782	4.44067	12.1741	2.74005e-07	8.3166e-05	7.50121
212640_at	PTPLB	-1.56974	7.99667	-12.1678	2.75319e-07	8.3166e-05	7.49654
222549_at	CLDN1	-1.061	4.70118	-12.1478	2.79599e-07	8.39547e-05	7.48146
209250_at	DEGS1	-1.3173	7.79395	-12.1413	2.81e-07	8.39547e-05	7.47658
1561817_at	AX747630	-2.8832	4.95786	-12.1325	2.8291e-07	8.40659e-05	7.46996
222067_x_at	HIST1H2BD	1.83909	8.46471	12.1196	2.85739e-07	8.44474e-05	7.46023
201149_s_at	TIMP3	2.35045	9.07631	12.0982	2.90493e-07	8.52946e-05	7.44409
225003_at	TMEM205	1.39825	10.0516	12.0916	2.91988e-07	8.52946e-05	7.43907
227198_at	AFF3	-2.63319	4.18653	-12.0815	2.94267e-07	8.52946e-05	7.43146
219922_s_at	LTBP3	1.31906	6.94892	12.079	2.94846e-07	8.52946e-05	7.42954
225645_at	EHF	-1.72804	3.90117	-12.0602	2.99177e-07	8.57362e-05	7.41527
218976_at	DNAJC12	1.76096	6.47023	12.0587	2.99508e-07	8.57362e-05	7.41419
222853_at	FLRT3	1.84394	4.87345	12.0483	3.01929e-07	8.57986e-05	7.40631
1558412_at	LOC113230 /// MIR1199	1.20445	6.13668	12.0444	3.02865e-07	8.57986e-05	7.40328
201148_s_at	TIMP3	2.06657	8.13807	12.0262	3.07159e-07	8.65665e-05	7.3895
224587_at	SUB1	-2.13176	7.20422	-11.9451	3.27202e-07	9.17424e-05	7.32756
201315_x_at	IFITM2	1.10301	8.45249	11.928	3.31591e-07	9.24986e-05	7.31449
224583_at	COTL1	-1.6244	5.98509	-11.8782	3.44791e-07	9.49105e-05	7.27619		ALCAM
216806_at	RP3-334F4.1	-1.23653	6.82623	-11.8763	3.4532e-07	9.49105e-05	7.27469		TARP
1553602_at	MUCL1	-2.00308	7.44547	-11.8758	3.45445e-07	9.49105e-05	7.27433		ALCAM
213801_x_at	RPSA /// RPSAP19 /// RPSAP58 /// RPSAP9 /// SNORA6 /// SNORA62	-1.04841	13.141	-11.8415	3.54905e-07	9.70223e-05	7.24781		SYBU
208642_s_at	XRCC5	-1.03787	9.98086	-11.7988	3.67061e-07	9.98461e-05	7.21472		LXN
203453_at	SCNN1A	-1.81844	5.59811	-11.7705	3.75346e-07	0.000101212	7.19279		ANKRD22
208910_s_at	C1QBP	-1.35693	8.69321	-11.7691	3.75783e-07	0.000101212	7.19164		CD36
200074_s_at	RPL14	-1.11816	11.447	-11.7549	3.80018e-07	0.00010185	7.18063		MYLK
201689_s_at	TPD52	-1.94142	7.31194	-11.7442	3.83253e-07	0.000102216	7.17229		PKIB
206280_at	CDH18	2.45814	5.59712	11.732	3.86988e-07	0.000102711	7.16275		KRT13
203909_at	SLC9A6	1.76549	4.56506	11.7065	3.94896e-07	0.000103812	7.14285		KRT15
221498_at	SNX27	-1.17165	7.00635	-11.7064	3.94932e-07	0.000103812	7.14276		ACSL1
225898_at	WDR54	1.32454	7.03894	11.6647	4.08292e-07	0.000105891	7.11001		MYC
232176_at	SLITRK6	-1.29814	4.48464	-11.6628	4.08909e-07	0.000105891	7.10853		STK38L
201511_at	AAMP	-1.03679	8.24917	-11.6581	4.10418e-07	0.000105891	7.1049		TM4SF1
210986_s_at	TPM1	-1.84979	8.02283	-11.649	4.13443e-07	0.000105891	7.09767		MUM1L1
201117_s_at	CPE	1.60799	4.56979	11.6487	4.13527e-07	0.000105891	7.09747		ACTA2
208614_s_at	FLNB	-1.41756	7.35274	-11.6459	4.1446e-07	0.000105891	7.09525		SDC2
225523_at	CCDC142 /// MRPL53	1.14896	8.26469	11.6156	4.24626e-07	0.000107983	7.07137		TM4SF1
209555_s_at	CD36	-2.28007	4.7051	-11.5984	4.30524e-07	0.000108976	7.05778		AX747630
219869_s_at	SLC39A8	-1.75652	7.51614	-11.5517	4.46967e-07	0.000112215	7.02082		PPP3CA
219038_at	MORC4	-1.02666	6.07739	-11.5504	4.47425e-07	0.000112215	7.01981		SMPDL3A
203058_s_at	PAPSS2	1.56361	4.18312	11.5349	4.53063e-07	0.00011311	7.00746		FABP5
210461_s_at	ABLIM1	-1.24306	7.29327	-11.5002	4.65934e-07	0.000115659	6.97982		WWC3
222457_s_at	LIMA1	-1.25758	4.9679	-11.496	4.67501e-07	0.000115659	6.97651		PALLD
218890_x_at	MRPL35	1.17195	6.98543	11.4709	4.77086e-07	0.000117499	6.95647		METTL7A
208579_x_at	H2BFS	2.032	10.106	11.4051	5.03283e-07	0.000123395	6.90366		ELF5
202491_s_at	IKBKAP	-1.79161	6.61222	-11.376	5.15318e-07	0.000125781	6.88029		AFF3
226843_s_at	PAPD5	-1.35383	7.29527	-11.3591	5.22476e-07	0.000126962	6.86665		FAS
224436_s_at	NIPSNAP3A	-1.40902	4.90366	-11.2782	5.58307e-07	0.000134589	6.80101		CLEC7A
222487_s_at	RPS27L	1.24442	7.12182	11.2771	5.58787e-07	0.000134589	6.80016		CNTNAP2
204981_at	SLC22A18	1.51829	7.05632	11.2629	5.65346e-07	0.000135572	6.7886		PALLD
203683_s_at	VEGFB	1.30385	4.9984	11.2421	5.75136e-07	0.00013693	6.77159		PALLD
240192_at	GATA3-AS1	2.13618	7.15846	11.2402	5.76021e-07	0.00013693	6.77007		SDC2
243313_at	SYNPO2L	-1.54623	6.10013	-11.2253	5.83133e-07	0.000138021	6.75791		STC2
205555_s_at	MSX2	1.82153	6.23817	11.1901	6.00354e-07	0.000141484	6.72906		CLEC3A
235736_at	SMKR1	-1.23019	7.02662	-11.1666	6.12143e-07	0.000143187	6.70977		FAS
209806_at	HIST1H2BK	1.8058	10.2005	11.1626	6.14159e-07	0.000143187	6.70651		SUB1
228635_at	PCDH10	3.39303	7.26048	11.1578	6.16639e-07	0.000143187	6.70252		ETNK2
202696_at	OXSR1	-1.11625	7.63446	-11.1365	6.27638e-07	0.000144794	6.68498		FHL2
210261_at	KCNK2	1.53413	5.57091	11.1112	6.40992e-07	0.000147253	6.66408		PPP3CA
49452_at	ACACB	2.1671	5.88076	11.1003	6.46805e-07	0.000147967	6.65512		WWC3
1564630_at	EDN1	-1.38913	5.35521	-11.0909	6.51914e-07	0.000148514	6.64731		PTGES
201082_s_at	DCTN1 /// SLC4A5	1.12106	6.45583	11.0851	6.55046e-07	0.000148609	6.64255		AGR2
205691_at	SYNGR3	1.37668	4.87901	11.0663	6.65412e-07	0.000149553	6.62696		CD36
225840_at	TEF	1.19069	6.10017	11.0633	6.67085e-07	0.000149553	6.62446		ZNF385B
235099_at	CMTM8	-1.60001	6.57186	-11.0581	6.70012e-07	0.000149553	6.62011		PREX1
204686_at	IRS1	1.74835	6.96901	11.0578	6.70149e-07	0.000149553	6.61991		CRAT
208669_s_at	EID1	1.26214	8.84288	11.0452	6.77252e-07	0.000150523	6.60944		ACSL1
227046_at	SLC39A11	-1.84739	8.20591	-11.0252	6.88699e-07	0.000152448	6.59278		SLC39A8
215719_x_at	FAS	-2.61968	5.27154	-10.9882	7.10413e-07	0.000156416	6.56192		TNS3
203417_at	MFAP2	1.31402	5.64023	10.985	7.12346e-07	0.000156416	6.55922		EPAS1
212378_at	GART	-1.09027	5.97391	-10.9784	7.16272e-07	0.000156649	6.55376		S100A6
214022_s_at	IFITM1	2.19833	5.00731	10.9542	7.31037e-07	0.000158609	6.53346		FBXO25
218720_x_at	SEZ6L2	1.14885	7.33191	10.9256	7.48885e-07	0.000161329	6.50946		SHROOM3
202200_s_at	SRPK1	-1.13146	7.2219	-10.9247	7.49476e-07	0.000161329	6.50868		SOWAHA
224703_at	DCAF5	1.12026	6.85839	10.9033	7.63141e-07	0.000163626	6.49069		EDN1
232202_at	FAM83B	1.50232	5.46879	10.8897	7.71972e-07	0.000164873	6.47924		PAPD5
208613_s_at	FLNB	-1.36376	7.72311	-10.8759	7.81072e-07	0.000166168	6.46757		SUB1
202605_at	GUSB	1.2055	7.51001	10.8422	8.03702e-07	0.000169752	6.43912		SEC14L1
221928_at	ACACB	1.44878	6.14702	10.8362	8.07855e-07	0.000169752	6.43398		CNTNAP2
235742_at	RHOC	1.01977	5.27745	10.8329	8.10102e-07	0.000169752	6.43121		TUFT1
208534_s_at	LOC102725198 /// RASA4 /// RASA4B /// RASA4CP	1.03443	5.0047	10.8323	8.10478e-07	0.000169752	6.43075		STC2
207431_s_at	DEGS1	-1.50027	9.04709	-10.8273	8.13946e-07	0.000169752	6.42649		HSPB11
209076_s_at	WDR45B	-1.13517	8.68381	-10.8048	8.29748e-07	0.000171843	6.40733		PPP3CA
214046_at	FUT9	-1.64149	4.00594	-10.7935	8.37789e-07	0.000172853	6.39772		KIF12
204149_s_at	GSTM4	-1.42946	6.60363	-10.7821	8.45931e-07	0.000173226	6.38807		C14orf182
225869_s_at	UNC93B1	1.08567	6.2289	10.7667	8.57154e-07	0.000174221	6.37493		FAS
228302_x_at	CAMK2N1	1.19388	5.28646	10.7667	8.57163e-07	0.000174221	6.37492		TTC12
205047_s_at	ASNS	-1.0386	7.52043	-10.7561	8.6496e-07	0.000175154	6.36589		AMD1
204952_at	LYPD3	1.48042	8.3148	10.7331	8.82166e-07	0.000177979	6.34623		TACC1
211864_s_at	MYOF	1.30066	5.66359	10.7275	8.86423e-07	0.000178181	6.34143		SLITRK6
232361_s_at	EHF	-1.165	3.80493	-10.7146	8.96273e-07	0.000179501	6.3304		EDN1
209911_x_at	HIST1H2BD	2.34097	9.05757	10.6958	9.10894e-07	0.000181763	6.31425		TFPI2
207626_s_at	SLC7A2	1.07321	4.27509	10.6674	9.33458e-07	0.000185588	6.28981		MUCL1
224936_at	EIF2S3	-1.01338	8.36605	-10.6597	9.39645e-07	0.000186142	6.28322		EPPK1
228773_at	LOC100506100	1.20442	6.29538	10.6551	9.43429e-07	0.000186217	6.2792		EPPK1
213166_x_at	MIR4784 /// MZT2A /// MZT2B	1.03425	8.97239	10.6482	9.49048e-07	0.000186652	6.27327		HSPB11
202468_s_at	CTNNAL1	-1.40191	6.92506	-10.6372	9.58083e-07	0.000186949	6.2638		TPD52
205431_s_at	BMP5	1.30841	4.67562	10.6325	9.61981e-07	0.000186949	6.25975		KCNK12
222116_s_at	TBC1D16	-1.45978	6.3874	-10.6299	9.64142e-07	0.000186949	6.2575		GBP1
229019_at	ZNF385B	-1.56332	5.14457	-10.6298	9.64234e-07	0.000186949	6.25741		PPT1
205769_at	SLC27A2	-1.25946	5.07459	-10.6243	9.68823e-07	0.000187001	6.25266		CNTNAP2
222802_at	EDN1	-2.18664	6.69563	-10.6213	9.71345e-07	0.000187001	6.25007		EFHD1
235350_at	C4orf19	-1.057	4.3425	-10.6133	9.78122e-07	0.000187645	6.24312		MYLK
218109_s_at	MFSD1	-1.04949	8.30058	-10.5962	9.92659e-07	0.000189768	6.22837		LOC102724257
209604_s_at	GATA3	1.1886	12.7448	10.5894	9.9854e-07	0.000190227	6.22247		PPP2R2C
216397_s_at	BOP1 /// MIR7112	-1.14344	6.7161	-10.5762	1.01008e-06	0.000191758	6.21098		IGFBP5
212543_at	AIM1	-1.03387	7.48718	-10.5671	1.01812e-06	0.000192015	6.20305		HIPK2
1555756_a_at	CLEC7A	-1.80159	4.09038	-10.5667	1.01846e-06	0.000192015	6.20271		CMTM8
208527_x_at	HIST1H2BE	1.73106	7.96418	10.5501	1.03323e-06	0.000194129	6.18832		RCN1
218998_at	FAM206A	-1.05688	7.14892	-10.5328	1.04893e-06	0.000196405	6.17323		SYNCRIP
208812_x_at	HLA-C	1.45807	8.5458	10.5169	1.06356e-06	0.000197887	6.15936		RASL11B
205206_at	KAL1	-1.23743	4.42806	-10.5164	1.06408e-06	0.000197887	6.15887		SDC1
208156_x_at	EPPK1	-1.10811	6.45525	-10.4902	1.08867e-06	0.000201768	6.13601		TFRC
239994_at	B3GALT5	-1.14365	3.95522	-10.4864	1.09233e-06	0.000201768	6.13265		CTPS1
212714_at	LARP4	-1.01016	7.41991	-10.4724	1.10575e-06	0.000203559	6.12042		EIF1AX
39248_at	AQP3	1.15658	6.38111	10.4285	1.14913e-06	0.000209429	6.08188		BCS1L
218100_s_at	IFT57	-1.13566	4.92196	-10.4023	1.17595e-06	0.000212757	6.05876		ARHGEF26
225955_at	METRNL	1.54088	8.82037	10.3993	1.17906e-06	0.000212757	6.05611		PTPLB
212444_at	GPRC5A	-1.43374	6.33475	-10.3852	1.1938e-06	0.000214708	6.04366		EIF2S3
231382_at	FGF18	-1.3556	3.90748	-10.3717	1.20818e-06	0.000216414	6.03166		VMP1
202052_s_at	RAI14	-1.72	4.86534	-10.3688	1.2112e-06	0.000216414	6.02915		ZNF385B
202555_s_at	MYLK	-1.85233	5.34357	-10.345	1.237e-06	0.000220021	6.00802		SHISA2
225342_at	AK4 /// LOC100507855	-1.37242	7.13284	-10.3397	1.24284e-06	0.000220021	6.00329		AMD1
208546_x_at	HIST1H2BH	1.86399	7.29384	10.3391	1.24347e-06	0.000220021	6.00278		HSPB8
208436_s_at	IRF7	1.30292	4.81903	10.3339	1.24918e-06	0.00022032	5.99818		TM4SF1
217942_at	MRPS35	-1.28984	8.15287	-10.328	1.25573e-06	0.000220763	5.99294		SHROOM3
213554_s_at	CDV3	-1.25604	7.8074	-10.3188	1.26597e-06	0.000221849	5.98479		SYNPO2L
206116_s_at	TPM1	-1.16735	7.62748	-10.3003	1.28694e-06	0.000224803	5.96831		HIPK2
240304_s_at	LOC102724257 /// TMC5	-1.85147	4.80478	-10.2406	1.35726e-06	0.000235582	5.91489		TPD52
239106_at	CA5BP1	-1.11071	4.76232	-10.209	1.39607e-06	0.000241551	5.88657		NUPR1
205133_s_at	HSPE1	-1.21554	8.48583	-10.1821	1.43008e-06	0.000246655	5.86238		AGR2
200878_at	EPAS1	-2.2204	6.09072	-10.1741	1.44049e-06	0.000247669	5.85509		AGO2
202894_at	EPHB4	1.13093	7.37968	10.1585	1.46068e-06	0.000249432	5.8411		PTPLB
205425_at	HIP1	1.08991	3.56682	10.1557	1.46443e-06	0.000249432	5.83852		EIF1AX
1555800_at	ZNF385B	-2.27604	4.24752	-10.1388	1.48685e-06	0.000252465	5.82324		MIR1204
205879_x_at	RET	1.19164	7.381	10.1306	1.49789e-06	0.000253552	5.8158		DUSP2
227329_at	ZBTB46	1.10572	4.75871	10.0095	1.67131e-06	0.000277227	5.70553		TPM1
227279_at	TCEAL3	1.08773	8.43058	10.0034	1.68063e-06	0.000277227	5.69993		EPB41L4B
1554080_at	RQCD1	-1.1327	4.89191	-10.0031	1.68112e-06	0.000277227	5.69964		ASAP1
203744_at	HMGB3	1.15599	8.82409	10.0019	1.68293e-06	0.000277227	5.69855		SH3BGRL
215313_x_at	HLA-A	1.17605	8.33337	10.0006	1.6849e-06	0.000277227	5.69738		GNMT
231577_s_at	GBP1	-1.7684	3.83872	-9.99523	1.69321e-06	0.000277227	5.69242		RABGGTB
215193_x_at	HLA-DQB1 /// HLA-DRB1 /// HLA-DRB3 /// HLA-DRB4 /// LOC100996809 /// LOC101060835	-1.44403	6.75729	-9.99503	1.69353e-06	0.000277227	5.69223		GSTM4
209301_at	CA2	3.3727	5.26037	9.94092	1.77928e-06	0.000286123	5.64245		TXLNG
232481_s_at	SLITRK6	-2.00713	4.72045	-9.93756	1.78475e-06	0.000286162	5.63935		NOP16
208758_at	ATIC	-1.01289	10.4897	-9.93225	1.79344e-06	0.000286715	5.63445		FLNB
201688_s_at	TPD52	-1.64087	8.50877	-9.92371	1.80754e-06	0.000288125	5.62656		GAL
202291_s_at	MGP	-1.06874	5.08335	-9.90631	1.8366e-06	0.000291061	5.61047		NAP1L1
214469_at	HIST1H2AE	2.06887	5.7064	9.88284	1.87661e-06	0.000295687	5.58874		NIPSNAP3A
1552508_at	KCNE4	2.11333	5.26267	9.87163	1.89606e-06	0.000296744	5.57833		IGFBP7
224840_at	FKBP5	-1.46384	7.09292	-9.86993	1.89903e-06	0.000296744	5.57675		KANK1
227197_at	ARHGEF26	-1.57439	7.12792	-9.86961	1.8996e-06	0.000296744	5.57645		CTNNAL1
207956_x_at	PDS5B	1.56446	6.52927	9.8521	1.93048e-06	0.00030071	5.56018		NRP1
227875_at	KLHL13	1.13564	4.04173	9.84076	1.95077e-06	0.000302648	5.54962		LCP1
212572_at	STK38L	-3.09262	6.26146	-9.83897	1.954e-06	0.000302648	5.54796		WWTR1
225710_at	GNB4	-1.25353	4.48795	-9.80221	2.02152e-06	0.000310631	5.51365		C14orf182
220161_s_at	EPB41L4B	-1.35638	7.06053	-9.79064	2.04329e-06	0.000312933	5.50283		GDAP1
208490_x_at	HIST1H2BC /// HIST1H2BE /// HIST1H2BF /// HIST1H2BG /// HIST1H2BI	1.77627	8.41	9.77897	2.06551e-06	0.0003142	5.49191		EDN1
209180_at	RABGGTB	-1.09315	7.40789	-9.77725	2.06881e-06	0.0003142	5.4903		REEP5
209340_at	UAP1	-1.19601	6.77728	-9.73703	2.14759e-06	0.000325262	5.45253		C9orf152
215779_s_at	HIST1H2BG /// HIST1H2BJ	2.69936	6.64169	9.7221	2.17766e-06	0.000328905	5.43848		PPIF
224925_at	PREX1	-1.67084	6.15586	-9.66805	2.29042e-06	0.000342211	5.38743		SEPP1
218127_at	NFYB	-1.08676	6.21331	-9.66788	2.29079e-06	0.000342211	5.38727		SEH1L
227406_at	GABPB1-AS1	-1.00867	7.43299	-9.64992	2.32966e-06	0.00034653	5.37025		AMPD2
204867_at	GCHFR	1.26546	5.72036	9.64002	2.3514e-06	0.00034653	5.36085		XK
227856_at	C4orf32	1.24714	6.69397	9.63077	2.37192e-06	0.000348614	5.35206		FLNB
229964_at	C9orf152	-1.38675	5.14232	-9.62708	2.38013e-06	0.000348884	5.34856		C1QBP
208753_s_at	NAP1L1	-1.41406	6.48529	-9.61984	2.3964e-06	0.000349396	5.34167		TSKU
201923_at	PRDX4	-1.20448	9.2822	-9.60856	2.42195e-06	0.000352181	5.33093		EPB41L4B
213194_at	ROBO1	1.08143	6.33867	9.60572	2.42844e-06	0.000352188	5.32822		TFRC
1552507_at	KCNE4	2.31793	5.51255	9.59938	2.44298e-06	0.00035336	5.32218		FGF18
219964_at	ST7L	1.36664	5.82893	9.58401	2.47862e-06	0.000356628	5.30752		PAPD5
226773_at	PPM1K	1.50277	5.32405	9.57849	2.49156e-06	0.000357548	5.30225		ARHGEF28
211698_at	EID1	1.02825	5.99362	9.5742	2.50165e-06	0.000358057	5.29815		C1orf116
225835_at	SLC12A2	1.5007	5.09342	9.56188	2.53093e-06	0.000359936	5.28637		ME1
205160_at	PEX11A	1.05609	6.25889	9.56178	2.53117e-06	0.000359936	5.28627		ABCC5
206976_s_at	HSPH1	-1.21092	8.66774	-9.55763	2.54111e-06	0.000359936	5.2823		SLC7A1
202718_at	IGFBP2	-1.09796	10.0141	-9.55063	2.558e-06	0.000361392	5.27559		CD44
206070_s_at	EPHA3	1.27852	3.29665	9.53447	2.59741e-06	0.000364308	5.2601		EIF1AX
228661_s_at	LOC102606465	-1.09174	5.37626	-9.53397	2.59863e-06	0.000364308	5.25963		BHLHE40
1553510_s_at	RQCD1	-1.08258	6.4049	-9.51912	2.63547e-06	0.000368528	5.24537		DEGS1
202295_s_at	CTSH	1.33374	7.72336	9.51158	2.65439e-06	0.000370226	5.23812		PTGES
202218_s_at	FADS2	1.17093	6.30068	9.4896	2.71038e-06	0.000375641	5.21696		HSPD1
201017_at	EIF1AX	-1.51296	6.75943	-9.43413	2.8575e-06	0.000393537	5.16337		TXNRD1
208180_s_at	HIST1H4H	1.54966	6.2068	9.41742	2.90353e-06	0.000398871	5.14716		UGCG
213122_at	TSPYL5	-1.28462	8.60795	-9.41259	2.91698e-06	0.000399714	5.14247		UGCG
205807_s_at	TUFT1	-2.1064	7.86139	-9.38135	3.00564e-06	0.00040782	5.11209		STAMBPL1
214459_x_at	HLA-C	1.2585	8.40173	9.38123	3.00597e-06	0.00040782	5.11197		TFRC
224935_at	EIF2S3	-1.56731	7.4685	-9.37193	3.03291e-06	0.000410457	5.10292		SLITRK6
223179_at	YPEL3	1.75652	7.23413	9.35775	3.07454e-06	0.00041328	5.08908		PPM1H
222673_x_at	FAM122B	-1.11574	6.95679	-9.35449	3.0842e-06	0.000413306	5.0859		SLC18B1
227117_at	XPOT	-1.17866	6.23571	-9.34811	3.10318e-06	0.000414833	5.07967		MRPS35
223041_at	CD99L2	1.61099	6.69231	9.33384	3.14613e-06	0.000418888	5.06571		SEMA3C
228176_at	S1PR3	1.72437	8.2303	9.32984	3.15826e-06	0.000418888	5.0618		LAD1
217196_s_at	CAMSAP2	-1.64908	6.615	-9.32718	3.1664e-06	0.000418888	5.05919		TSPYL5
224970_at	NFIA	-1.45849	5.06799	-9.3254	3.17183e-06	0.000418888	5.05745		UGCG
232994_s_at	ARHGEF28	-1.34845	4.32499	-9.31058	3.2175e-06	0.000422877	5.04293		NRXN3
201798_s_at	MYOF	1.13313	6.88511	9.30615	3.23132e-06	0.000423046	5.03858		RNF144B
201266_at	TXNRD1	-1.31296	8.30247	-9.30346	3.23972e-06	0.000423046	5.03594		MAFB
218728_s_at	CNIH4	-1.1411	6.88314	-9.3018	3.24492e-06	0.000423046	5.03431		GPRC5A
219401_at	XYLT2	1.16721	6.46245	9.29241	3.27449e-06	0.000424403	5.0251		SLC27A2
209457_at	DUSP5	-1.17339	5.70001	-9.28959	3.28344e-06	0.000424403	5.02232		SLC7A1
219295_s_at	PCOLCE2	-1.1769	4.34537	-9.27756	3.32191e-06	0.000427354	5.01049		LIMA1
207388_s_at	PTGES	-1.31572	6.41356	-9.26594	3.3595e-06	0.000430165	4.99905		PPP2R2C
203628_at	IGF1R	1.92337	4.65714	9.25647	3.39049e-06	0.000431544	4.98972		CDV3
223064_at	RNF181	1.2325	9.31967	9.25542	3.39395e-06	0.000431544	4.98869		GNB4
204348_s_at	AK4 /// LOC100507855	-1.31167	8.707	-9.24862	3.41642e-06	0.000432391	4.98198		MAP7
208306_x_at	HLA-DRB1 /// HLA-DRB1	-1.45972	6.68152	-9.23906	3.44831e-06	0.000434415	4.97254		ARHGAP29
226301_at	SLC18B1	-1.29225	4.07395	-9.23011	3.47843e-06	0.000437203	4.96369		ATR
232035_at	HIST1H4H	1.67841	6.4693	9.21748	3.52144e-06	0.000440583	4.9512		HOPX
212298_at	NRP1	-1.40001	5.10283	-9.20997	3.5473e-06	0.000442805	4.94376		DIP2B
209324_s_at	RGS16	1.20188	6.00005	9.19736	3.59115e-06	0.000446338	4.93127		NOTCH2
217892_s_at	LIMA1	-1.67417	6.91461	-9.19714	3.59193e-06	0.000446338	4.93105		ABLIM1
219302_s_at	CNTNAP2	-1.74722	4.14645	-9.19202	3.60989e-06	0.000447553	4.92597		SLC7A5
204004_at	PAWR	-1.13486	8.66772	-9.18729	3.62662e-06	0.000448274	4.92127		KAL1
204744_s_at	IARS	-1.21759	8.9486	-9.18574	3.6321e-06	0.000448274	4.91973		MINA
1554406_a_at	CLEC7A	-1.0667	5.70326	-9.17568	3.66794e-06	0.000449652	4.90975		G3BP1
38671_at	PLXND1	1.68146	7.57171	9.1479	3.76902e-06	0.00045998	4.88209		NEK6
213513_x_at	ARPC2	-1.13287	8.43457	-9.13977	3.79916e-06	0.000461396	4.87399		PPIF
203953_s_at	CLDN3	1.13909	9.60743	9.13741	3.80794e-06	0.000461396	4.87164		SMKR1
216959_x_at	NRCAM	1.37427	4.9764	9.13451	3.81881e-06	0.000461396	4.86874		RASD1
208627_s_at	YBX1	-1.06983	10.759	-9.13317	3.8238e-06	0.000461396	4.86741		IARS
213581_at	PDCD2	-1.06419	6.34205	-9.13119	3.83125e-06	0.000461396	4.86543		KIAA1217
1558290_a_at	MIR1204 /// PVT1	-1.50644	6.57351	-9.12759	3.84482e-06	0.000461801	4.86183		HSPE1
204989_s_at	ITGB4	1.16868	6.80049	9.12581	3.85151e-06	0.000461801	4.86006		NDC1
228400_at	SHROOM3	-1.55182	5.84531	-9.09447	3.97201e-06	0.000474169	4.8287		HSPH1
204105_s_at	NRCAM	1.92111	6.05417	9.07012	4.06844e-06	0.000483344	4.80427		ONECUT2
226000_at	CTTNBP2NL	1.46855	5.81294	9.06839	4.07538e-06	0.000483344	4.80254		ANLN
203298_s_at	JARID2	1.38136	6.05743	9.05557	4.12727e-06	0.000488439	4.78965		TES
213932_x_at	HLA-A	1.02928	8.19331	9.03292	4.22071e-06	0.000496274	4.76685		NOTCH2
208643_s_at	XRCC5	-1.0304	8.54685	-9.02414	4.25757e-06	0.000499534	4.75799		PRDX4
202310_s_at	COL1A1	1.60382	4.93638	8.99253	4.39314e-06	0.000513236	4.72605		CENPV
57588_at	SLC24A3	1.55907	4.38705	8.98076	4.44482e-06	0.000515387	4.71413		ABCE1
223065_s_at	STARD3NL	-1.1053	6.72944	-8.97975	4.44925e-06	0.000515387	4.71311		FN1
206110_at	HIST1H3A /// HIST1H3B /// HIST1H3C /// HIST1H3D /// HIST1H3E /// HIST1H3F /// HIST1H3G /// HIST1H3H /// HIST1H3I /// HIST1H3J	1.71293	6.43981	8.95081	4.57931e-06	0.000528215	4.68373		PHLDB2
231876_at	TRIM56	1.36401	6.09252	8.94634	4.59976e-06	0.000529457	4.67919		RPF2
213201_s_at	TNNT1	1.91281	7.27965	8.91628	4.73993e-06	0.000544444	4.64858		RUVBL1
200931_s_at	VCL	-1.13698	8.64926	-8.90878	4.77559e-06	0.000545247	4.64093		UAP1
229912_at	SDK1	1.04165	3.74021	8.90852	4.77683e-06	0.000545247	4.64066		ZYX
223573_s_at	PPP2R2C	-1.02716	6.28551	-8.89384	4.84758e-06	0.00055217	4.62566		GNG10
243492_at	THEM4	-1.18181	4.37442	-8.87913	4.91959e-06	0.000559207	4.61062		MAOA
230263_s_at	DOCK5	-1.0956	5.36415	-8.86037	5.01313e-06	0.000564899	4.5914		RPL37A
204017_at	KDELR3	1.27805	5.53093	8.85975	5.01627e-06	0.000564899	4.59076		LARS
204480_s_at	C9orf16	1.08857	8.32433	8.85549	5.03777e-06	0.000564899	4.58639		HSPD1
203438_at	STC2	-2.09063	6.05622	-8.84847	5.07345e-06	0.000564899	4.57919		PRKDC
201391_at	TRAP1	-1.06191	8.22307	-8.84654	5.08332e-06	0.000564899	4.57721		FN1
224586_x_at	SUB1	-1.10587	9.7487	-8.84153	5.10903e-06	0.000566605	4.57205		TPD52L1
230630_at	AK4 /// LOC100507855	-1.07604	6.29855	-8.8344	5.14583e-06	0.000569531	4.56473		DANCR
223158_s_at	NEK6	-1.23294	6.67502	-8.83136	5.16162e-06	0.000570125	4.5616		THEM4
201516_at	SRM	-1.44414	9.52523	-8.80537	5.29871e-06	0.000579413	4.53484		CD36
216547_at	RP4-710M16.1	-1.04542	7.1147	-8.79683	5.34462e-06	0.000583267	4.52602		EPDR1
200807_s_at	HSPD1	-1.18951	11.768	-8.78705	5.39775e-06	0.00058556	4.51592		ANLN
212377_s_at	NOTCH2	-1.24592	8.81647	-8.78107	5.43047e-06	0.000587942	4.50975		SLC5A3
201560_at	CLIC4	-1.05782	8.23834	-8.76963	5.49376e-06	0.000593619	4.49791		HIPK2
203297_s_at	JARID2	1.14414	6.59406	8.76619	5.51294e-06	0.000594517	4.49435		PHGDH
206698_at	XK	-1.36688	3.69743	-8.75928	5.5517e-06	0.00059697	4.48719		XPOT
223201_s_at	LOC101928589 /// TMEM164	-1.10864	7.05394	-8.75631	5.56844e-06	0.00059697	4.48412		APIP
204417_at	GALC	1.24317	5.83912	8.75387	5.58225e-06	0.000597279	4.48158		PCOLCE2
208937_s_at	ID1	-1.06393	7.44541	-8.75158	5.59523e-06	0.000597498	4.47921		TXN
235072_s_at	KIF13A	1.00522	6.54302	8.74775	5.617e-06	0.000597697	4.47525		DUSP5
201169_s_at	BHLHE40	-1.06329	5.46434	-8.74741	5.61895e-06	0.000597697	4.47489		LOC151760
209417_s_at	IFI35	1.48749	5.07183	8.72324	5.75869e-06	0.00061127	4.44979		EHF
203789_s_at	SEMA3C	-1.28555	8.67784	-8.71021	5.8356e-06	0.00061714	4.43622		ABCB10
224791_at	ASAP1	-1.48477	6.0853	-8.70186	5.88543e-06	0.000620944	4.42753		EIF1AX
206925_at	ST8SIA4	2.35875	4.86795	8.70039	5.89428e-06	0.000620944	4.426		IPO5
205483_s_at	ISG15	1.05073	8.70215	8.69265	5.94095e-06	0.000624541	4.41793		CDK19
213222_at	PLCB1	1.23845	5.15972	8.69095	5.95127e-06	0.000624541	4.41616		ME1
221881_s_at	CLIC4	-1.06983	7.10954	-8.67465	6.05114e-06	0.000631509	4.39914		VARS
217362_x_at	HLA-DRB6	-1.13627	6.72697	-8.65449	6.17721e-06	0.000639301	4.37806		NFIA
202449_s_at	RXRA	1.29391	8.90304	8.65365	6.18254e-06	0.000639301	4.37717		ELOVL5
212646_at	RFTN1	1.23965	4.5236	8.65319	6.18546e-06	0.000639301	4.37669		C4orf19
201163_s_at	IGFBP7	-1.02082	2.96502	-8.63591	6.29595e-06	0.000649493	4.35858		B3GALT5
227607_at	STAMBPL1	-1.29831	4.99038	-8.62441	6.37066e-06	0.000655962	4.34651		BOP1
203767_s_at	STS	-1.01039	3.74563	-8.61053	6.46215e-06	0.000661887	4.33192		CNIH4
217733_s_at	TMSB10	1.26458	11.1013	8.61017	6.46452e-06	0.000661887	4.33155		SLBP
225481_at	FRMD6	1.09028	5.53201	8.60607	6.49184e-06	0.000663441	4.32723		ITPR1
238077_at	KCTD6	1.08458	4.13737	8.60338	6.50984e-06	0.000664041	4.3244		NLN
207174_at	GPC5	-1.12658	3.55149	-8.57911	6.67455e-06	0.000677013	4.29883		VCL
222428_s_at	LARS	-1.19002	6.58642	-8.57737	6.68655e-06	0.000677013	4.29699		HLA-DRB6
224909_s_at	PREX1	-2.27584	7.52789	-8.56661	6.76121e-06	0.000682468	4.28562		IFT57
228766_at	CD36	-1.18161	3.01327	-8.56272	6.7884e-06	0.000682468	4.28151		WDR45B
202350_s_at	LOC100506558 /// MATN2	1.26486	6.14102	8.56244	6.79035e-06	0.000682468	4.28122		PAWR
209161_at	PRPF4	-1.0301	8.12149	-8.54604	6.90637e-06	0.000691585	4.26388		HPRT1
231741_at	S1PR3	1.33006	5.78724	8.53343	6.99703e-06	0.000699384	4.25052		ARPC2
228622_s_at	DNAJC4	1.11769	5.49954	8.5152	7.13048e-06	0.000711421	4.23117		RQCD1
225516_at	SLC7A2	1.29933	7.6769	8.49239	7.30131e-06	0.000724178	4.20692		ZYX
200885_at	RHOC	1.40281	10.6015	8.49107	7.31132e-06	0.000724178	4.20552		SRPK1
205020_s_at	ARL4A	1.13567	8.02785	8.46695	7.49705e-06	0.000735909	4.17982		MYADM
239196_at	ANKRD22	-1.46888	5.46493	-8.45593	7.58363e-06	0.000743074	4.16805		AGO2
209603_at	GATA3	1.2532	7.75053	8.44914	7.63756e-06	0.000747019	4.16079		GPC5
229163_at	CAMK2N1	1.30235	5.63051	8.44583	7.66394e-06	0.00074826	4.15726		LOC729680
201462_at	SCRN1	1.08653	10.0274	8.43667	7.7376e-06	0.000752764	4.14745		INPP5F
225665_at	ZAK	1.08433	5.01246	8.42036	7.87067e-06	0.000759363	4.12998		HSPA1A
208691_at	TFRC	-1.57944	9.60292	-8.41916	7.88051e-06	0.000759363	4.1287		RPL14
200884_at	CKB	1.161	6.08809	8.41816	7.88876e-06	0.000759363	4.12762		OXSR1
203887_s_at	THBD	-1.16669	3.9657	-8.40224	8.02136e-06	0.00076807	4.11053		FAM122B
201491_at	AHSA1	-1.07576	9.2195	-8.38335	8.18181e-06	0.000780698	4.09023		TACC1
1553179_at	ADAMTS19	1.89294	6.23455	8.3799	8.21153e-06	0.00078217	4.08651		METTL8
204637_at	CGA	1.00622	4.70146	8.35239	8.45246e-06	0.000802323	4.05685		SPPL2A
202587_s_at	AK1	1.05951	7.35385	8.33439	8.61425e-06	0.000814852	4.0374		FDFT1
223253_at	EPDR1	-1.18131	3.97931	-8.30432	8.89208e-06	0.000831067	4.00483		CA5BP1
203476_at	TPBG	1.47941	8.73977	8.27712	9.1518e-06	0.000846611	3.97528		MCCC2
209230_s_at	NUPR1	-1.53602	5.68869	-8.27275	9.19431e-06	0.000847721	3.97053		ENTPD1
214463_x_at	HIST1H4J	1.1773	6.53255	8.26106	9.30909e-06	0.000855419	3.95779		EPPK1
242648_at	KLHL8	-1.05121	5.66782	-8.24684	9.45073e-06	0.000866977	3.94229		ZNHIT6
233446_at	ONECUT2	-1.20855	4.69244	-8.243	9.48939e-06	0.000869066	3.93809		IPO7
229477_at	THRSP	-1.65898	4.94288	-8.22936	9.62812e-06	0.000878827	3.92319		SUB1
200806_s_at	HSPD1	-1.31514	10.8869	-8.22576	9.66506e-06	0.000880728	3.91926		NFYB
230493_at	SHISA2	-1.56144	5.11704	-8.22076	9.71673e-06	0.000880891	3.91378		RQCD1
212798_s_at	ANKMY2	1.14928	5.92331	8.21935	9.73128e-06	0.000880891	3.91225		SDC1
201128_s_at	ACLY	-1.09521	9.98136	-8.15606	1.04124e-05	0.000920931	3.84275		PFAS
240827_at	GATA3-AS1	1.19991	6.68726	8.156	1.0413e-05	0.000920931	3.84269		NMU
202443_x_at	NOTCH2	-1.20576	9.08807	-8.14508	1.05356e-05	0.000927595	3.83066		LMO4
223384_s_at	TRIM4	1.26305	5.11669	8.12875	1.0722e-05	0.000937964	3.81263		MAD2L1
218932_at	ZNHIT6	-1.10706	4.66434	-8.12091	1.08128e-05	0.000941386	3.80397		NEK6
215706_x_at	ZYX	-1.19435	8.11518	-8.11767	1.08506e-05	0.000941676	3.80038		SUB1
237460_x_at	C14orf182	-2.07355	5.61001	-8.1108	1.09311e-05	0.000944165	3.79279		IL13RA1
201887_at	IL13RA1	-1.07332	7.00169	-8.09696	1.10953e-05	0.000951192	3.77746		YBX1
201307_at	11-Sep	-1.41156	6.87654	-8.06285	1.15115e-05	0.000977349	3.73959		CLIC4
204404_at	SLC12A2	1.56535	8.00929	8.05483	1.16118e-05	0.000984304	3.73067		MGP
201614_s_at	RUVBL1	-1.19741	7.18002	-8.05337	1.16301e-05	0.000984332	3.72904		MGLL
202100_at	RALB	1.10326	6.97684	8.04835	1.16935e-05	0.000988161	3.72346		PDZK1
205019_s_at	VIPR1	1.00815	6.37278	8.02364	1.2011e-05	0.00100875	3.6959		CLEC7A
214214_s_at	C1QBP	-1.16899	8.58075	-8.00146	1.23039e-05	0.00103177	3.67111		PDCD2
200808_s_at	ZYX	-1.13209	7.85067	-7.97918	1.2606e-05	0.0010494	3.64615		ID1
233337_s_at	SEZ6L2	1.24978	7.10039	7.97889	1.26101e-05	0.0010494	3.64582		BHLHE40
1552619_a_at	ANLN	-1.18093	6.50263	-7.97543	1.26577e-05	0.00105176	3.64194		TRAP1
203954_x_at	CLDN3	1.09431	8.99728	7.97163	1.27102e-05	0.00105324	3.63768		YBX3
239777_at	C14orf182	-1.39699	4.11994	-7.97137	1.27139e-05	0.00105324	3.63738		SPPL2A
33304_at	ISG20	1.249	4.70487	7.96536	1.27976e-05	0.00105696	3.63063		KDM4B
221755_at	EHBP1L1	1.08003	4.73152	7.94483	1.30878e-05	0.00107283	3.60754		PARVA
227550_at	GFRA1	1.35144	6.57126	7.94112	1.31411e-05	0.00107558	3.60336		CLDN1
223077_at	TMOD3	-1.00124	6.36248	-7.93187	1.32748e-05	0.00108167	3.59294		RBM47
223296_at	SLC25A33	-1.04447	7.26026	-7.92905	1.33158e-05	0.0010834	3.58976		XPOT
212857_x_at	SUB1	-1.07398	9.72205	-7.91166	1.3572e-05	0.0010977	3.57014		BAG2
203562_at	FEZ1	1.08459	5.2729	7.90483	1.36741e-05	0.0011027	3.56242		CLIC4
216504_s_at	SLC39A8	-1.01251	4.25249	-7.89146	1.38764e-05	0.00111572	3.5473		CCL2
218094_s_at	DBNDD2 /// SYS1 /// SYS1-DBNDD2	1.23145	5.64502	7.88405	1.39899e-05	0.00112155	3.53891		C4orf19
203060_s_at	PAPSS2	1.50237	4.37499	7.86808	1.4238e-05	0.0011381	3.52081		FAM206A
218280_x_at	HIST2H2AA3 /// HIST2H2AA4	1.65687	9.77937	7.86629	1.42661e-05	0.00113869	3.51877		LARS
202631_s_at	APPBP2	1.09315	8.48652	7.86154	1.43409e-05	0.00114019	3.51339		NDC1
210387_at	HIST1H2BG /// HIST1H2BJ	2.89574	7.24883	7.85573	1.44331e-05	0.00114494	3.50678		NAA25
208523_x_at	HIST1H2BC /// HIST1H2BE /// HIST1H2BF /// HIST1H2BG /// HIST1H2BI	1.64313	6.64926	7.85472	1.44492e-05	0.00114494	3.50564		ASNS
206782_s_at	DNAJC4	1.13884	5.4216	7.85273	1.4481e-05	0.00114538	3.50337		ACLY
209120_at	NR2F2	1.57816	6.81076	7.833	1.47999e-05	0.00116422	3.48093		XRCC5
201016_at	EIF1AX	-1.57606	5.90551	-7.82932	1.48602e-05	0.00116569	3.47674		AAMP
224856_at	FKBP5	-1.17177	7.01658	-7.81229	1.51429e-05	0.00118108	3.45732		AIM1
206335_at	GALNS	1.54816	6.90612	7.80685	1.52345e-05	0.00118484	3.45111		TXLNG
201797_s_at	VARS	-1.15189	5.45203	-7.80379	1.52861e-05	0.00118717	3.44762		ATP8A2
217191_x_at	COX6CP1 /// COX6CP1	1.39678	5.58408	7.79701	1.54015e-05	0.00119443	3.43987		PLCH1
221760_at	MAN1A1	1.41004	4.06867	7.77472	1.57874e-05	0.00121151	3.41436		XRCC5
205016_at	TGFA	1.29961	4.03352	7.76459	1.59661e-05	0.00121796	3.40276		FASN
213568_at	OSR2	1.33751	6.85744	7.7575	1.60927e-05	0.00122035	3.39461		PRPF4
223072_s_at	INO80B /// INO80B-WBP1 /// WBP1	1.16035	7.15245	7.74985	1.62303e-05	0.00122568	3.38583		CMSS1
214290_s_at	HIST2H2AA3 /// HIST2H2AA4	1.59866	11.3862	7.74642	1.62924e-05	0.00122847	3.3819		PPP2R2C
224976_at	NFIA	-1.14931	4.8054	-7.74491	1.63199e-05	0.00122847	3.38016		MORC4
213188_s_at	MINA	-1.23455	5.87614	-7.7363	1.64773e-05	0.00122847	3.37026		RBM47
226748_at	LYSMD2	-1.70576	7.94397	-7.73429	1.65144e-05	0.00122847	3.36794		PON2
219197_s_at	SCUBE2	1.33392	5.18028	7.72802	1.66304e-05	0.00123541	3.36073		SMTN
201160_s_at	YBX3	-1.06164	7.78986	-7.72509	1.66849e-05	0.0012361	3.35735		RHOBTB1
1569003_at	VMP1	-1.56364	7.5069	-7.72265	1.67303e-05	0.00123612	3.35455		SNX27
205696_s_at	GFRA1	1.82946	5.61428	7.71527	1.68688e-05	0.001243	3.34604		TPD52L1
229544_at	RP11-391M1.4	-1.09696	5.61761	-7.70699	1.70257e-05	0.00124783	3.33649		BCAT1
203409_at	DDB2	1.00573	7.41121	7.7047	1.70694e-05	0.00124936	3.33385		IGFBP7
202436_s_at	CYP1B1	1.40641	9.7443	7.69864	1.71857e-05	0.00125211	3.32685		AGL
212563_at	BOP1 /// MIR7112	-1.49472	7.41699	-7.69677	1.72215e-05	0.00125211	3.3247		NOTCH2
228969_at	AGR2	-1.51754	6.45987	-7.69337	1.72873e-05	0.00125502	3.32077		PAWR
208978_at	CRIP2	1.47062	8.38044	7.69233	1.73075e-05	0.00125502	3.31957		LIMCH1
221727_at	SUB1	-2.48336	6.05259	-7.6737	1.76727e-05	0.00127306	3.29803		SLC7A1
202435_s_at	CYP1B1	1.35774	8.1114	7.66639	1.78183e-05	0.00128018	3.28956		ISCA1
203108_at	GPRC5A	-1.26638	7.0629	-7.66049	1.79368e-05	0.00128363	3.28272		EIF2S3
202708_s_at	HIST2H2BE	1.29184	8.61494	7.65765	1.79942e-05	0.00128606	3.27942		ATIC
207966_s_at	GLG1	1.25888	7.57889	7.65298	1.80889e-05	0.0012883	3.27401		SLC39A8
208647_at	FDFT1	-1.11072	9.16883	-7.65178	1.81133e-05	0.0012883	3.27262		AHNAK
224872_at	DIP2B	-1.24782	6.69056	-7.64925	1.8165e-05	0.0012883	3.26968		STS
215071_s_at	HIST1H2AC	1.60366	7.77962	7.64256	1.83021e-05	0.00129453	3.26191		LARP4
219382_at	SERTAD3	1.04602	7.32423	7.63475	1.84639e-05	0.00130092	3.25283		PLEKHO1
215073_s_at	NR2F2	1.01203	4.31756	7.63051	1.85523e-05	0.00130379	3.2479		TTF2
205471_s_at	DACH1	2.10246	4.57728	7.62768	1.86115e-05	0.00130546	3.24462		COTL1
202854_at	HPRT1	-1.13472	8.53344	-7.62144	1.87429e-05	0.0013071	3.23736		TEAD4
216080_s_at	FADS3	1.06639	5.55424	7.6178	1.882e-05	0.00130806	3.23312		AK2
210319_x_at	MSX2	1.45806	5.32674	7.61652	1.88473e-05	0.00130806	3.23162		TMOD3
229649_at	NRXN3	-1.28283	4.3855	-7.61604	1.88574e-05	0.00130806	3.23107		PSMG1
228865_at	C1orf116	-1.34163	5.02359	-7.61515	1.88763e-05	0.00130806	3.23004		CUX1
225368_at	HIPK2	-1.60165	7.05704	-7.61377	1.89058e-05	0.00130845	3.22843		KIF13A
213459_at	RPL37A	-1.19019	4.05036	-7.60685	1.9054e-05	0.00131538	3.22036		DDB2
210517_s_at	AKAP12	1.59463	4.75955	7.6045	1.91048e-05	0.00131556	3.21762		KRCC1
205380_at	PDZK1	-1.06754	3.48049	-7.60307	1.91357e-05	0.00131603	3.21595		CGA
219229_at	SLCO3A1	1.35309	4.45004	7.59591	1.92912e-05	0.0013234	3.20759		DNAJC22
203607_at	INPP5F	-1.12331	5.33704	-7.58458	1.954e-05	0.00133377	3.19437		VIPR1
209121_x_at	NR2F2	1.1665	7.26121	7.56908	1.9886e-05	0.00134897	3.17624		DNASE1L1
225968_at	PRICKLE2	2.11415	6.1778	7.5651	1.9976e-05	0.00135021	3.17158		TMEM64
226152_at	TTC7B	1.19523	4.74618	7.56391	2.00031e-05	0.00135021	3.17018		NR2F2
222427_s_at	LARS	-1.05572	6.97723	-7.54538	2.04282e-05	0.00137212	3.14847		PSD3
1557948_at	PHLDB3	1.05069	6.11677	7.53658	2.06336e-05	0.00137915	3.13814		CERS4
218510_x_at	FAM134B	1.07676	6.01391	7.52069	2.101e-05	0.00140259	3.11947		PLXDC2
218499_at	MST4	-1.10268	7.61951	-7.51523	2.11411e-05	0.00140619	3.11304		PNPLA8
227520_at	TXLNG	-1.4277	5.83277	-7.48659	2.18435e-05	0.00144064	3.07928		PXDN
209504_s_at	PLEKHB1	1.32653	5.75621	7.47301	2.21854e-05	0.00145617	3.06323		RHOC
216264_s_at	LAMB2	1.16766	6.28836	7.45656	2.26072e-05	0.00147414	3.04377		SLC4A8
218698_at	APIP	-1.17825	6.92271	-7.45602	2.26211e-05	0.00147414	3.04314		IGF1R
204415_at	IFI6	2.40335	6.0078	7.45433	2.26651e-05	0.00147526	3.04113		TFF3
209623_at	MCCC2	-1.10934	10.0711	-7.44417	2.29306e-05	0.00148899	3.0291		EID1
209617_s_at	CTNND2	1.38798	5.73754	7.43117	2.32754e-05	0.00150835	3.01367		HLA-A
225613_at	MAST4	1.19681	5.37887	7.43086	2.32839e-05	0.00150835	3.0133		FRMD6
208885_at	LCP1	-1.39743	7.30831	-7.42964	2.33165e-05	0.00150867	3.01185		VCPKMT
218922_s_at	CERS4	1.01441	5.34182	7.42621	2.34086e-05	0.00151061	3.00778		MDK
1564838_a_at	LOC151760	-1.17294	4.42206	-7.42543	2.34294e-05	0.00151061	3.00686		CYP1B1
226584_s_at	FAM110A	1.10868	6.47068	7.41862	2.36138e-05	0.00151661	2.99876		EPHB4
219932_at	SLC27A6	1.23746	4.78914	7.41586	2.36888e-05	0.00151661	2.99548		GULP1
208828_at	POLE3	-1.09344	8.79152	-7.39202	2.43482e-05	0.00154436	2.96709		SFXN1
1566557_at	BAIAP2-AS1	1.38585	4.03218	7.3855	2.45322e-05	0.00154868	2.95931		MYOF
231822_at	CTTNBP2NL	1.29749	5.87029	7.38459	2.45579e-05	0.00154868	2.95823		KLHL13
209903_s_at	ATR	-1.25039	5.56256	-7.37795	2.47468e-05	0.00155521	2.95031		ARL4A
209602_s_at	GATA3	1.18042	8.5849	7.36678	2.50683e-05	0.0015682	2.93696		NMI
208754_s_at	NAP1L1	-1.45087	6.27376	-7.36192	2.52097e-05	0.0015744	2.93115		ROGDI
208788_at	ELOVL5	-1.14855	8.38576	-7.36139	2.5225e-05	0.0015744	2.93052		DNAJC4
1552616_a_at	ACACB	1.24099	5.54118	7.35257	2.5484e-05	0.00158525	2.91996		CLDN3
219370_at	RPRM	1.41076	6.79096	7.3525	2.54858e-05	0.00158525	2.91989		JARID2
200799_at	HSPA1A /// HSPA1B	-1.11999	10.9643	-7.345	2.57083e-05	0.00159185	2.91089		EFNA5
239742_at	LOC101930415	1.5944	6.61236	7.34127	2.58196e-05	0.00159693	2.90643		GLCCI1
204623_at	TFF3	1.02636	8.05395	7.29734	2.71711e-05	0.00165971	2.85366		HDGFRP3
226611_s_at	CENPV	-1.20299	5.75401	-7.29647	2.71988e-05	0.00165971	2.8526		SEZ6L2
232164_s_at	EPPK1	-1.97354	8.53058	-7.28667	2.75109e-05	0.00166389	2.8408		CCDC142
219450_at	C4orf19	-1.14732	6.01811	-7.28474	2.75728e-05	0.00166579	2.83848		ANKMY2
202890_at	MAP7	-1.25237	6.14422	-7.28339	2.76162e-05	0.00166658	2.83685		MEIS2
209524_at	HDGFRP3	1.14744	8.12294	7.27931	2.7748e-05	0.00167084	2.83193		PPM1K
210337_s_at	ACLY	-1.03788	9.75484	-7.27226	2.79769e-05	0.00167724	2.82343		HMGB3
225888_at	NAA25	-1.04111	6.03656	-7.26859	2.80972e-05	0.0016826	2.81899		AQP3
204059_s_at	ME1	-1.15991	7.76531	-7.2577	2.84567e-05	0.00169669	2.80583		CD24
203439_s_at	STC2	-2.53779	7.22544	-7.24801	2.8781e-05	0.00170308	2.79411		CD55
214745_at	PLCH1	-1.03133	4.68581	-7.24531	2.88719e-05	0.00170308	2.79085		BACE2
216526_x_at	HLA-C	1.2552	7.17129	7.24162	2.89969e-05	0.00170308	2.78637		CKB
227682_at	SPPL2A	-1.06154	5.34668	-7.23007	2.93918e-05	0.00171871	2.77238		SCD5
225330_at	IGF1R	1.12463	4.11549	7.22465	2.95792e-05	0.00172598	2.7658		ZKSCAN1
216438_s_at	TMSB4X	1.05658	11.2639	7.22031	2.97299e-05	0.00173293	2.76054		NR2F2
226863_at	FAM110C	1.38636	4.49035	7.18659	3.09312e-05	0.00178634	2.71954		XYLT2
211719_x_at	FN1	-1.20137	6.04944	-7.16945	3.15622e-05	0.00180697	2.69863		LAMB2
1554690_a_at	TACC1	-1.11559	3.9597	-7.16305	3.18013e-05	0.00181792	2.69082		ITGB4
200887_s_at	STAT1	1.03561	7.38477	7.15204	3.22169e-05	0.00183294	2.67738		PIK3R3
207480_s_at	MEIS2	1.14943	3.73894	7.13447	3.2893e-05	0.00186286	2.65587		FADS2
228266_s_at	HDGFRP3	1.23115	7.79618	7.13182	3.2996e-05	0.00186562	2.65263		MRPL35
224920_x_at	MYADM	-1.12935	6.84164	-7.12894	3.31088e-05	0.00186908	2.6491		MR1
218309_at	CAMK2N1	1.28154	7.52678	7.10245	3.41645e-05	0.0019086	2.61659		GPX3
226269_at	GDAP1	-1.39696	4.37866	-7.09448	3.44894e-05	0.00191443	2.60679		YPEL5
212741_at	MAOA	-1.19088	5.22138	-7.08196	3.50063e-05	0.00193722	2.59138		HLA-A
226517_at	BCAT1	-1.02137	3.09312	-7.05834	3.60042e-05	0.0019824	2.56227		HIST1H4J
202630_at	APPBP2	1.32431	7.61126	7.0479	3.64554e-05	0.00199788	2.54936		GATA3
210367_s_at	PTGES	-2.33447	6.35743	-7.04761	3.6468e-05	0.00199788	2.54901		YPEL5
220488_s_at	BCAS3	1.09568	10.7648	7.03606	3.69743e-05	0.00200462	2.53472		KCNE4
227606_s_at	STAMBPL1	-1.0917	4.23818	-7.03338	3.70929e-05	0.00200462	2.5314		CD24
212686_at	PPM1H	-1.29316	7.25416	-7.0313	3.71849e-05	0.00200462	2.52884		GATA3
207565_s_at	MR1	1.17477	4.65977	7.03064	3.72142e-05	0.00200462	2.52802		TEF
235061_at	PPM1K	1.15203	3.34982	7.0294	3.72697e-05	0.00200563	2.52648		IFITM3
223218_s_at	NFKBIZ	1.56374	4.72646	7.02579	3.74306e-05	0.00201088	2.52201		PSD3
201348_at	GPX3	1.17581	5.89156	7.01558	3.78906e-05	0.00202509	2.50936		KDELR3
213548_s_at	CDV3	-1.83337	6.40648	-7.00391	3.84237e-05	0.00203963	2.49488		EPHA3
201018_at	EIF1AX	-1.31888	6.07193	-6.99367	3.88982e-05	0.0020489	2.48216		ISG20
212651_at	RHOBTB1	-1.02283	4.59587	-6.97563	3.97499e-05	0.00207401	2.45971		EPHA3
233059_at	KCNJ3	1.61147	5.55822	6.97069	3.99869e-05	0.00208416	2.45355		CAMK2N1
203957_at	E2F6	1.21322	6.98609	6.9697	4.00345e-05	0.00208465	2.45232		JADE2
204030_s_at	IQCJ-SCHIP1 /// SCHIP1	-1.09099	4.12152	-6.93945	4.15192e-05	0.00214022	2.41457		C6orf141
203964_at	NMI	1.13702	5.17888	6.92621	4.21881e-05	0.0021618	2.398		HIST2H2BE
214730_s_at	GLG1	1.08019	8.12344	6.9235	4.23264e-05	0.00216685	2.39461		RXRA
218394_at	ROGDI	1.13847	6.45891	6.92113	4.24474e-05	0.00217101	2.39165		CTTNBP2NL
1556308_at	PRRT3	1.09637	6.51277	6.91986	4.25126e-05	0.00217231	2.39006		LURAP1L
225827_at	AGO2	-1.51402	8.47912	-6.89711	4.3699e-05	0.00221226	2.36152		SLC7A2
207046_at	HIST1H4A /// HIST1H4B /// HIST1H4C /// HIST1H4D /// HIST1H4E /// HIST1H4F /// HIST1H4H /// HIST1H4I /// HIST1H4J /// HIST1H4K /// HIST1H4L /// HIST2H4A /// HIST2H4B /// HIST4H4	1.18051	4.42431	6.87018	4.51496e-05	0.00225233	2.32766		TGFA
221577_x_at	GDF15	1.66758	6.55032	6.86479	4.54462e-05	0.00226506	2.32087		MYOF
233814_at	EFNA5	1.1444	5.06728	6.84024	4.68234e-05	0.00231471	2.2899		CAMK2N1
201286_at	SDC1	-1.08219	6.01172	-6.83746	4.69822e-05	0.00231797	2.28639		IRF7
223320_s_at	ABCB10	-1.16482	4.07036	-6.83686	4.70166e-05	0.00231797	2.28563		VEGFB
232165_at	EPPK1	-2.00062	8.73488	-6.83238	4.72742e-05	0.0023223	2.27996		GLDN
217783_s_at	YPEL5	1.17591	6.70356	6.83092	4.73584e-05	0.00232435	2.27812		BMP5
225007_at	G3BP1	-1.23295	7.18159	-6.82148	4.79063e-05	0.00234702	2.26619		CYP1B1
222608_s_at	ANLN	-1.20778	5.35987	-6.8132	4.83932e-05	0.00236452	2.2557		TMEM64
224901_at	SCD5	1.16414	5.0729	6.81173	4.84803e-05	0.00236666	2.25383		MFAP2
225464_at	FRMD6	1.02959	6.95243	6.78677	4.99829e-05	0.00242056	2.22217		LTBP3
201287_s_at	SDC1	-1.58289	7.78846	-6.78573	5.00462e-05	0.00242149	2.22085		APPBP2
209274_s_at	ISCA1	-1.01361	6.52661	-6.78456	5.01179e-05	0.00242281	2.21937		WDR54
225688_s_at	PHLDB2	-1.19903	3.49868	-6.74936	5.23299e-05	0.00250797	2.17456		PLEKHB1
213005_s_at	KANK1	-1.40349	6.25625	-6.74475	5.26271e-05	0.0025152	2.16868		S1PR3
209312_x_at	HLA-DQB1 /// HLA-DRB1 /// HLA-DRB4 /// HLA-DRB5 /// LOC100996809 /// LOC101060835	-1.60808	6.94606	-6.73086	5.35345e-05	0.00254397	2.15094		STC1
202133_at	WWTR1	-1.39702	5.28289	-6.71384	5.46691e-05	0.00258585	2.12917		CTSH
203220_s_at	TLE1	1.3936	5.69575	6.71378	5.4673e-05	0.00258585	2.1291		SCUBE2
1555950_a_at	CD55	1.16038	8.37458	6.69894	5.56833e-05	0.00262025	2.1101		OSR2
204932_at	TNFRSF11B	2.51925	4.22118	6.69482	5.5968e-05	0.00263117	2.1048		TMC4
203566_s_at	AGL	-1.02068	6.68932	-6.68538	5.6625e-05	0.00264771	2.09269		SYT1
202260_s_at	STXBP1	1.35987	4.85498	6.67657	5.72455e-05	0.00266828	2.08138		GFRA1
214755_at	UAP1L1	1.20599	5.8488	6.66405	5.81404e-05	0.00270079	2.06527		SLCO3A1
214746_s_at	ZNF467	1.51388	6.95557	6.66143	5.83295e-05	0.00270489	2.0619		CYP1B1
201019_s_at	EIF1AX	-1.16471	8.07683	-6.65778	5.85938e-05	0.00271034	2.05721		STXBP1
204407_at	TTF2	-1.00762	4.80394	-6.63836	6.00235e-05	0.00276012	2.03218		TRIM56
223159_s_at	NEK6	-1.07523	5.73644	-6.62785	6.08131e-05	0.00278239	2.01861		ST7L
209942_x_at	MAGEA3 /// MAGEA6	-1.1728	4.91873	-6.6192	6.14715e-05	0.0028008	2.00743		MT1F
225116_at	HIPK2	-1.54074	7.14766	-6.60236	6.2775e-05	0.00283841	1.98565		NRCAM
214522_x_at	HIST1H2AD /// HIST1H3D	1.04441	6.15747	6.59249	6.35528e-05	0.00285752	1.97286		SYNGR3
202437_s_at	CYP1B1	1.30992	9.00071	6.58481	6.41659e-05	0.0028768	1.96289		LINC01116
212325_at	LIMCH1	-1.01703	4.28736	-6.57409	6.5031e-05	0.00290014	1.94898		JARID2
210756_s_at	NOTCH2	-1.02014	9.0166	-6.56771	6.55526e-05	0.00291168	1.94068		BAIAP2-AS1
203287_at	LAD1	-1.28475	7.83229	-6.56443	6.58224e-05	0.00291168	1.93642		FAM110C
202720_at	TES	-1.20606	6.90593	-6.55601	6.65197e-05	0.00293067	1.92547		CTNND2
204364_s_at	REEP1	1.24721	6.59658	6.55056	6.69764e-05	0.00293895	1.91837		TLE1
204058_at	ME1	-1.33542	4.74997	-6.54433	6.7501e-05	0.00295013	1.91026		COX6CP1
212160_at	XPOT	-1.05965	8.84649	-6.53615	6.81976e-05	0.00297108	1.8996		TMEM205
211959_at	IGFBP5	-1.60562	5.72346	-6.52602	6.90715e-05	0.00299959	1.88638		DCLK1
228058_at	ZG16B	1.2148	8.04508	6.52504	6.91564e-05	0.0030009	1.8851		RHOC
212877_at	KLC1	1.10271	5.3892	6.49605	7.17271e-05	0.00309281	1.84719		PRSS8
205591_at	OLFM1	1.23284	6.72991	6.4905	7.22305e-05	0.00310663	1.83992		CYP1B1
227670_at	ZNF75A	1.05539	6.45619	6.48827	7.24343e-05	0.00311103	1.837		DACH1
223622_s_at	HYI	1.07364	5.53434	6.46614	7.44873e-05	0.0031695	1.80796		MAN1A1
226865_at	PLXDC2	1.01624	4.2543	6.4661	7.44912e-05	0.0031695	1.8079		RPRM
211026_s_at	MGLL	-1.06838	6.95101	-6.445	7.65075e-05	0.00323765	1.78015		GGCX
202048_s_at	CBX6	1.09161	8.84805	6.4443	7.65754e-05	0.00323802	1.77923
204005_s_at	PAWR	-1.0181	7.04532	-6.42183	7.87894e-05	0.00330884	1.74962		STC1
225569_at	AGO2 /// CASC7 /// CASC7	-1.12698	5.94374	-6.40293	8.07056e-05	0.00336068	1.72465		ACACB
211671_s_at	NR3C1	1.03396	6.59506	6.3751	8.36192e-05	0.00344528	1.68779		MSX2
1554438_at	KIAA1217	-1.21558	4.14702	-6.37434	8.37009e-05	0.00344604	1.68678		HLA-C
206315_at	CRLF1	1.06029	6.17197	6.37189	8.39634e-05	0.00345425	1.68352		ST7L
228275_at	LINC00888	1.03648	3.99505	6.36549	8.46523e-05	0.00347214	1.67503		CTTNBP2NL
204204_at	SLC31A2	-1.6263	6.32995	-6.35725	8.55482e-05	0.00349317	1.66409		CRIP2
226403_at	TMC4	1.34509	7.26827	6.35613	8.56706e-05	0.00349555	1.6626		IFI27
228915_at	DACH1	1.41001	3.36901	6.34933	8.64186e-05	0.0035184	1.65357		MAOB
210328_at	GNMT	-1.47867	4.73536	-6.34725	8.66488e-05	0.00352494	1.6508		TPBG
201427_s_at	SEPP1	-1.37929	6.30042	-6.33492	8.80285e-05	0.0035597	1.63438		LYPD3
221006_s_at	SNX27	-1.02226	6.81975	-6.33217	8.83396e-05	0.00356455	1.63071		IFI35
211259_s_at	BMP7	1.20258	6.57608	6.32674	8.89559e-05	0.00358149	1.62349		SLC12A2
207332_s_at	TFRC	-1.35566	9.54062	-6.32007	8.97211e-05	0.00360434	1.61458		FAM83B
209772_s_at	CD24	1.26001	8.87584	6.31947	8.97896e-05	0.00360444	1.61379		PAPSS2
1556499_s_at	COL1A1	1.58085	3.84645	6.3181	8.99482e-05	0.00360551	1.61196		PPM1K
205226_at	PDGFRL	1.04704	4.57967	6.31317	9.05189e-05	0.00362042	1.60538		GPATCH2
206052_s_at	SLBP	-1.13866	7.35063	-6.3047	9.15089e-05	0.00364934	1.59407		ZNF467
230261_at	ST8SIA4	1.92044	3.91656	6.28985	9.32737e-05	0.00369814	1.57422		BMP7
234672_s_at	NDC1	-1.21487	6.47013	-6.28253	9.41574e-05	0.00372238	1.56441		SLC22A18
212175_s_at	AK2	-1.0025	6.94799	-6.24293	9.90952e-05	0.003859	1.51127		KCNK2
204881_s_at	UGCG	-1.30448	10.0064	-6.21718	0.000102455	0.00392713	1.4766		METRNL
202613_at	CTPS1	-1.57894	7.32589	-6.19356	0.000105646	0.00398908	1.44472		GALNS
201197_at	AMD1	-2.03815	6.02156	-6.18798	0.000106416	0.00401229	1.43717		HIST1H4H
225755_at	KLHDC8B	1.0948	6.39552	6.16343	0.000109873	0.00409216	1.40392		ST6GALNAC2
228855_at	NUDT7	1.23215	5.10467	6.16218	0.000110053	0.00409328	1.40222		SLC24A3
1557954_at	TXLNG	-1.03215	6.462	-6.14885	0.000111983	0.00414905	1.38414		PAPSS2
219522_at	FJX1	-1.09221	5.53073	-6.12983	0.000114802	0.00422112	1.35828		NFKBIZ
212218_s_at	FASN	-1.03027	11.3447	-6.12441	0.00011562	0.00424262	1.3509		PDS5B
203998_s_at	SYT1	1.34779	3.55913	6.11373	0.000117247	0.0042745	1.33636		SLC12A2
224870_at	DANCR	-1.18327	9.2554	-6.11049	0.000117747	0.00428835	1.33194		PDGFA
209048_s_at	ZMYND8	1.5726	8.11288	6.10185	0.000119089	0.00432497	1.32015		ZMYND8
219037_at	RRP15	-1.04651	6.47534	-6.09927	0.000119492	0.00432952	1.31663		NR2F2
228153_at	RNF144B	-1.28065	6.27994	-6.07794	0.000122888	0.00439431	1.28749		RASSF8
217833_at	SYNCRIP	-1.59794	6.88951	-6.07732	0.000122988	0.00439502	1.28664		COL1A1
212464_s_at	FN1	-1.18839	5.77017	-6.06443	0.000125093	0.00444227	1.26899		LOC101930415
227443_at	LURAP1L	1.29847	7.29858	6.04806	0.000127821	0.00450704	1.24655		AKAP12
207691_x_at	ENTPD1	-1.10835	4.63167	-6.04126	0.000128973	0.00453919	1.23721		HIST2H2AA3
221059_s_at	COTL1	-1.00586	6.34684	-6.03268	0.000130443	0.00457602	1.22542		HIST1H2AC
225866_at	RPF2	-1.19792	6.77672	-5.98993	0.00013804	0.00477378	1.16654		COL1A1
211905_s_at	ITGB4	1.06825	4.90411	5.96293	0.000143083	0.00491089	1.12921		CPE
223467_at	RASD1	-1.22861	8.09416	-5.94462	0.000146615	0.00498607	1.10384		CD99L2
202525_at	PRSS8	1.40549	7.33254	5.92956	0.000149592	0.00504561	1.08293		KCNJ3
209590_at	BMP7	1.05782	7.06529	5.90247	0.000155109	0.00517426	1.04524		TFF1
224523_s_at	CMSS1	-1.02824	6.36296	-5.9007	0.000155478	0.00518023	1.04277		IGFBP4
203405_at	PSMG1	-1.00096	7.47617	-5.89801	0.000156039	0.0051926	1.03902		KYNU
212492_s_at	KDM4B	-1.0612	6.45372	-5.89647	0.00015636	0.00520011	1.03688		GDF15
206023_at	NMU	-1.07748	5.02661	-5.88758	0.000158234	0.00523695	1.02449		SOX9
218073_s_at	NDC1	-1.05408	5.01699	-5.85386	0.000165567	0.00543034	0.977352		NFKBIZ
212014_x_at	CD44	-1.31944	7.08505	-5.85024	0.000166375	0.00544853	0.972286		HIST1H4H
218940_at	VCPKMT	1.03054	4.50723	5.84959	0.00016652	0.00544853	0.971379		PLXND1
207390_s_at	SMTN	-1.02437	7.04793	-5.8468	0.000167148	0.00546059	0.967467		KYNU
209591_s_at	BMP7	1.51494	8.43105	5.84593	0.000167344	0.00546059	0.966248		SEMA4C
219078_at	GPATCH2	1.51292	6.58382	5.82238	0.000172741	0.00557535	0.933214		APOBEC3B
211323_s_at	ITPR1	-1.13861	5.28648	-5.80627	0.000176543	0.00565199	0.910564		STMN3
211580_s_at	PIK3R3	1.16873	6.96284	5.79964	0.000178133	0.00568002	0.901233		S1PR3
216693_x_at	HDGFRP3	1.03897	8.31296	5.79121	0.000180178	0.00572414	0.889353		ST8SIA4
225097_at	HIPK2	-1.17983	7.16027	-5.78366	0.000182031	0.00576886	0.878707		HIST1H2BE
214652_at	DRD1	2.19855	4.61536	5.77787	0.000183465	0.0057949	0.870539		NUCB2
205066_s_at	ENPP1	1.12412	6.42167	5.7762	0.000183881	0.00580249	0.868186		IRS1
1553185_at	RASEF	1.04474	7.46018	5.77366	0.000184515	0.00581418	0.864602		YPEL3
211597_s_at	HOPX	-1.24878	4.21819	-5.77035	0.000185345	0.00582399	0.859933		SLC39A6
230163_at	GFRA1	1.06099	5.7999	5.76035	0.000187879	0.00587659	0.845802		DNAJC12
211986_at	AHNAK	-1.01183	7.64047	-5.75215	0.000189985	0.0059154	0.834201		KYNU
200670_at	XBP1	-1.74928	9.63604	-5.7356	0.00019431	0.00601921	0.810778		SLC9A6
204698_at	ISG20	1.28108	4.84263	5.7312	0.000195478	0.00604171	0.80454		HIST1H2B
212944_at	SLC5A3	-1.18088	4.72698	-5.72766	0.000196425	0.00605728	0.799512		ELOVL2
212360_at	AMPD2	-1.3697	7.21302	-5.7234	0.000197567	0.00607536	0.793479		LGALS1
1560316_s_at	GLCCI1	1.22372	6.29643	5.72299	0.000197678	0.00607536	0.792895		HIST1H2BK
201489_at	PPIF	-1.23136	9.16722	-5.71947	0.00019863	0.00609774	0.787898		MSX2
202345_s_at	FABP5	-2.80086	6.72631	-5.71786	0.000199067	0.00610445	0.785611		SYT1
203354_s_at	PSD3	1.01387	5.0615	5.71784	0.000199072	0.00610445	0.785586		GFRA1
201312_s_at	SH3BGRL	-1.48132	8.57651	-5.6956	0.000205212	0.00625766	0.75397		HIST1H2BC
216598_s_at	CCL2	-1.05752	3.89179	-5.69421	0.000205601	0.00626575	0.752001		HIST1H2BD
227069_at	CUX1	1.00125	4.96036	5.68969	0.000206876	0.00628038	0.745566		FLRT3
214455_at	HIST1H2BC /// HIST1H2BE /// HIST1H2BF /// HIST1H2BG /// HIST1H2BI	1.8312	4.60071	5.66938	0.000212713	0.00639506	0.716614		LIN7A
217867_x_at	BACE2	1.16065	5.72676	5.64507	0.000219932	0.00655501	0.681883		CD99L2
209771_x_at	CD24	1.21243	11.12	5.63149	0.000224078	0.00664841	0.662446		SLC39A6
204521_at	FAM216A	-1.62058	5.56352	-5.63038	0.000224421	0.00664841	0.660857		HMGB3
205472_s_at	DACH1	1.20535	3.38328	5.62801	0.000225153	0.00665778	0.657468		HIST1H2BH
209162_s_at	PRPF4	-1.16643	8.41561	-5.59384	0.000236016	0.006858	0.608433		NAT1
228067_at	KIAA1211L	1.07858	3.78656	5.58225	0.000239829	0.00692324	0.591758		LINC00052
216379_x_at	CD24	1.18804	11.2646	5.57876	0.00024099	0.00694446	0.586729		ADAMTS19
223982_s_at	PNPLA8	1.09958	5.91116	5.56063	0.000247115	0.00705537	0.56061		TNNT1
218223_s_at	PLEKHO1	-1.00884	4.81134	-5.53446	0.000256257	0.007237	0.522812		ST8SIA4
208651_x_at	CD24	1.15682	9.61031	5.51319	0.000263955	0.00737441	0.492013		NRCAM
224967_at	UGCG	-1.29926	9.11936	-5.49491	0.000270768	0.00748825	0.465492		CPE
225974_at	TMEM64	1.01186	8.97624	5.49182	0.000271937	0.00750539	0.461009		IGF1R
224917_at	MIR21 /// VMP1	-1.76975	7.86586	-5.49002	0.000272625	0.00751421	0.458382		PLXND1
221765_at	UGCG	-1.28306	7.03132	-5.48323	0.000275222	0.00755788	0.448517		SLC39A6
221667_s_at	HSPB8	-1.55806	7.85195	-5.46508	0.000282295	0.00766739	0.422115		IRS1
212295_s_at	SLC7A1	-1.33187	8.53815	-5.45937	0.000284561	0.00770399	0.413795		LOC101926959
219529_at	CLIC3	-1.81177	6.53135	-5.42368	0.000299171	0.00797949	0.361698		DNAJC12
209406_at	BAG2	-1.05835	5.42613	-5.41609	0.000302381	0.00801003	0.350592		H2BFS
201490_s_at	PPIF	-1.38509	8.57337	-5.37297	0.00032133	0.00837803	0.287354		GPER1
230069_at	SFXN1	1.13287	4.99073	5.36473	0.000325094	0.00845316	0.275239		TIMP3
221931_s_at	SEH1L	-1.37839	6.49031	-5.36211	0.0003263	0.00846087	0.271387		HIST1H2AE
225944_at	NLN	-1.13768	6.01985	-5.34038	0.000336495	0.00865376	0.239377		TWIST1
201866_s_at	NR3C1	1.05723	6.46392	5.33372	0.000339687	0.00870308	0.229557		SLC39A6
227370_at	FAM171B	1.19392	4.56007	5.28624	0.000363408	0.00913532	0.159336		ACACB
1553186_x_at	RASEF	1.03392	7.47793	5.25598	0.000379448	0.00938686	0.114408		DACH1
204596_s_at	STC1	1.33366	5.87446	5.24988	0.000382771	0.00944832	0.105339		KCNE4
206071_s_at	EPHA3	1.2812	4.6979	5.24489	0.00038551	0.00948168	0.0979226		PRICKLE2
203912_s_at	DNASE1L1	1.01176	6.44044	5.22134	0.00039874	0.00968212	0.0628285		GATA3-AS1
202935_s_at	SOX9	1.66939	4.77658	5.21746	0.000400967	0.0097219	0.0570344		COX6C
1554667_s_at	METTL8	-1.11285	6.45449	-5.21415	0.000402878	0.00975093	0.0520904		ACACB
201196_s_at	AMD1	-1.55869	8.11851	-5.2106	0.000404935	0.00978339	0.0467942		PODXL
222408_s_at	YPEL5	1.1847	7.47911	5.20523	0.00040807	0.00981939	0.038772		IFITM1
223811_s_at	GET4 /// SUN1	1.00071	6.7498	5.19941	0.000411494	0.00987555	0.0300839		DRD1
208964_s_at	FADS1 /// MIR1908	1.03851	7.8518	5.17524	0.00042606	0.0101414	-0.00609263		MALRD1
218245_at	TSKU	-1.35648	9.44461	-5.1721	0.000427993	0.0101741	-0.0108012		TIMP1
206566_at	SLC7A1	-1.25768	5.65178	-5.16016	0.00043543	0.0102919	-0.0287136		KCNE4
202411_at	IFI27	1.47765	4.78267	5.15991	0.000435582	0.0102919	-0.0290773		TIMP3
202431_s_at	MYC	-3.10123	7.8228	-5.14608	0.000444368	0.0104319	-0.0498441		TBC1D9
237215_s_at	TFRC	-1.2983	6.44973	-5.13915	0.000448846	0.0105144	-0.0602691		HIST1H2BD
242338_at	TMEM64	1.31024	7.82256	5.10743	0.000469945	0.0108552	-0.10803		ST8SIA4
218559_s_at	MAFB	-1.27876	6.61323	-5.09999	0.000475048	0.0109227	-0.119261		TIMP3
225799_at	LINC00152 /// LOC101930489 /// MIR4435-1HG	1.10199	8.50877	5.09997	0.000475064	0.0109227	-0.119295		ST8SIA4
220441_at	DNAJC22	1.00759	6.45941	5.09893	0.000475781	0.0109254	-0.120864		TGFB1
242943_at	ST8SIA4	2.34972	4.17263	5.09823	0.000476262	0.0109297	-0.121914		SLC24A3
211953_s_at	IPO5	-1.16393	4.59887	-5.0703	0.000495999	0.0112092	-0.164126		HIST1H1C
203627_at	IGF1R	1.02081	3.88255	5.06806	0.00049762	0.0112195	-0.167519		IFI6
208694_at	PRKDC	-1.18924	5.00123	-5.05241	0.000509103	0.0113891	-0.191235		SEMA4C
218035_s_at	RBM47	-1.06078	7.9742	-5.0421	0.000516816	0.0115216	-0.206864		GPER1
230836_at	ST8SIA4	1.7279	3.64148	5.04178	0.000517059	0.0115216	-0.207352		CDH18
209035_at	MDK	1.03314	8.30311	5.02796	0.000527606	0.0116883	-0.22834		TBC1D9
242881_x_at	BC017398 /// CTD-2314B22.3 /// DQ786293 /// DUXAP10 /// LL22NC03-N64E9.1	-1.03348	5.05387	-5.02486	0.000530003	0.0117291	-0.233052		TNFRSF11B
227599_at	MB21D2	1.22634	7.01149	5.01593	0.000536971	0.0118383	-0.246627		IFT
203362_s_at	MAD2L1	-1.0767	6.76393	-4.9966	0.0005524	0.0120713	-0.276069		WNT2B
203786_s_at	TPD52L1	-1.18817	9.55533	-4.99036	0.000557482	0.0121581	-0.285586		LGALS3BP
222496_s_at	RBM47	-1.026	6.76318	-4.98645	0.00056069	0.0122086	-0.29155		CA2
223217_s_at	NFKBIZ	1.67352	6.68857	4.94251	0.000598126	0.0128298	-0.358709		TIMP3
235020_at	TAF4B	-1.00814	4.74093	-4.93323	0.000606374	0.0129329	-0.372938		SLC6A14
228977_at	LOC729680	-1.12635	5.76612	-4.9299	0.000609362	0.0129688	-0.378044		PCDH10
219659_at	ATP8A2	-1.03137	4.7484	-4.90565	0.000631597	0.0132207	-0.415275		WNT2B
200993_at	IPO7	-1.10587	7.29897	-4.89567	0.000640993	0.0133657	-0.430616		TNFRSF11B
228478_at	SPPL2A	-1.11108	5.00565	-4.89057	0.00064585	0.0134399	-0.438456		CSTA
217890_s_at	PARVA	-1.06102	6.6383	-4.86385	0.000671968	0.0137243	-0.479633		EVL
214240_at	GAL	-1.416	5.79878	-4.85004	0.000685916	0.0139104	-0.500968		WNT2B
201873_s_at	ABCE1	-1.09626	6.51031	-4.82937	0.000707353	0.0141769	-0.532925
212013_at	PXDN	1.01967	6.63143	4.82723	0.000709608	0.0142063	-0.53623
209146_at	MSMO1	-1.0488	7.87334	-4.80605	0.000732403	0.0145209	-0.569059
212899_at	CDK19	-1.16118	6.0096	-4.78863	0.000751725	0.0147844	-0.596092
213302_at	PFAS	-1.07938	5.94523	-4.78259	0.000758555	0.0148706	-0.605481
212290_at	SLC7A1	-1.01536	7.79717	-4.74946	0.000797188	0.0154015	-0.657043
201063_at	RCN1	-1.59917	5.30246	-4.74123	0.000807116	0.0155282	-0.669887
236313_at	CDKN2B	1.07104	4.25685	4.72725	0.000824264	0.0157686	-0.691704
223310_x_at	PNPLA8	1.01663	6.3007	4.69505	0.000865269	0.0162461	-0.742079
205009_at	TFF1	1.63497	10.2846	4.69414	0.000866452	0.0162461	-0.743497
227525_at	GLCCI1	1.1446	4.51088	4.66546	0.000904851	0.0166968	-0.78848
212565_at	STK38L	-1.16992	4.06707	-4.60014	0.000999219	0.0179064	-0.891354
201508_at	IGFBP4	1.65724	7.19778	4.59232	0.00101119	0.0180499	-0.903704
201195_s_at	SLC7A5	-1.23778	10.2654	-4.58727	0.00101902	0.0181245	-0.911696
1552575_a_at	C6orf141	1.2848	4.98438	4.55467	0.00107104	0.0187389	-0.9633
200704_at	LITAF	-1.04353	9.97669	-4.5449	0.00108718	0.0189425	-0.978805
203355_s_at	PSD3	1.27528	4.57922	4.53612	0.0011019	0.0191258	-0.992737
202434_s_at	CYP1B1	1.12514	5.92563	4.4761	0.00120837	0.0204047	-1.08828
201872_s_at	ABCE1	-1.20293	7.48663	-4.47437	0.00121159	0.0204456	-1.09105
204237_at	GULP1	1.13258	3.71665	4.46077	0.00123728	0.0207446	-1.11277
204595_s_at	STC1	1.11537	6.72582	4.45384	0.00125057	0.0208778	-1.12383
210830_s_at	PON2	-1.02527	6.1333	-4.44457	0.00126861	0.0210888	-1.13866
266_s_at	CD24	1.08426	8.68754	4.42632	0.00130493	0.021542	-1.16789
213110_s_at	COL4A5	1.22407	5.03445	4.36286	0.00144003	0.02314	-1.26983
203023_at	NOP16	-1.42028	6.57856	-4.34643	0.00147737	0.0235292	-1.29631
210372_s_at	TPD52L1	-1.02225	7.99613	-4.32384	0.00153038	0.0240718	-1.33277
220029_at	ELOVL2	1.7849	4.36465	4.31226	0.00155832	0.0243502	-1.35148
41037_at	TEAD4	-1.00377	5.07698	-4.28494	0.00162643	0.0250352	-1.39569
202274_at	ACTG2	-1.81215	7.52986	-4.28453	0.00162746	0.0250441	-1.39635
226363_at	ABCC5	-1.33417	5.59728	-4.22321	0.00179212	0.0267936	-1.49593
214670_at	ZKSCAN1	1.16514	5.82218	4.21811	0.0018066	0.0269557	-1.50424
218303_x_at	KRCC1	1.00573	6.54679	4.16873	0.00195318	0.0284666	-1.58478
225706_at	GLCCI1	1.09793	6.57162	4.1193	0.00211254	0.030078	-1.6657
209205_s_at	LMO4	-1.0768	7.17475	-3.88611	0.00307151	0.0392068	-2.05106
228935_at	SLC4A8	1.02062	4.4242	3.85638	0.00322321	0.0404846	-2.10059
209049_s_at	ZMYND8	1.1093	8.52101	3.83029	0.00336286	0.0418063	-2.14415
204490_s_at	CD44	-1.04739	6.81178	-3.6831	0.00427811	0.0497354	-2.39092
