# Supplementary material for: Identification and characterization of critical genes associated with tamoxifen resistance in breast cancer
Source: PeerJ journal article supplement (doi:10.7717/peerj.10468), 2020-12-04
Supplement: Raw_data.zip [file Figure 4-PCR Raw Data.xlsx]

## Sheet: 工作表1
	MCF-7/RT			MCF-7
ACLY	2	1.5	2	1	1	1.11
HSPD1	2.64	2.42	2.816	1	0.88	0.78
PFAS	2.11	1.5	2.2	1.11	1	0.68
GART	2.86	3.08	2.816	1	0.68	1
TXN	8	7	6	1.11	0.78	1.11
HSPH1	3.036	3.08	2.816	1	1	0.78
HSPE1	5	6	6	1	0.68	1
IARS	5	5	4	0.68	1	0.68
TRAP1	2.398	2.2	2.376	0.78	0.88	1
ATIC	1.4	1.5	1.6	1	0.78	1.11
