# Supplementary material for: Identification and characterization of critical genes associated with tamoxifen resistance in breast cancer
Source: PeerJ journal article supplement (doi:10.7717/peerj.10468), 2020-12-04
Supplement: Raw_data.zip [file Table 3-Patients.xlsx]

## Sheet: 工作表1
ID_no	Admission_no	Sex (0=Male, 1=Female)	Age	Her-2（0=negative，1=positive）	ER（0=negative，1=positive）	PR（0=negative，1=positive）	Ki67（0: ＜15%，1: ≥15%）
1	316589	1	49.3589	0	1	1	1
2	290389	1	41.6192	0	1	1	1
3	186589	1	36.874	0	1	0	1
4	299797	1	53.5562	0	1	1	1
5	247132	1	47.589	0	1	1	0
6	213892	1	39.074	0	1	1	1
7	290389	1	41.6192	0	1	1	1
8	310724	1	49.8493	0	1	1	1
9	316589	1	49.3589	0	1	1	1
10	293499	1	42.9726	0	1	1	1
11	272204	1	33.8822	0	1	1	1
12	287302	1	33.6	1	1	1	0
13	227234	1	40.8986	0	1	1	1
14	269507	1	48.6932	1	1	0	1
15	254706	1	43.9918	1	1	0	1
16	308891	1	72.6548	1	1	0	1
17	249664	1	42.474	0	1	1	1
18	234878	1	49.8384	0	1	0	1
19	111766	1	38.2274	0	1	1	1
20	287302	1	33.6	1	1	1	1
21	164521	1	47	0	1	1	0
22	164599	1	48	0	0	1	1
23	165311	1	64	0	1	1	0
24	165952	1	55	0	1	1	1
25	166001	1	61	0	1	1	1
26	166604	1	52	0	1	1	0
27	166938	1	43	0	1	1	0
28	167018	1	44	0	1	1	1
29	168161	1	61	0	1	1	0
30	168691	1	54	1	1	1	1
31	168768	1	33	0	1	1	1
32	169006	1	37	0	1	1	0
33	178431	1	40	0	1	1	0
34	178551	1	38	0	1	1	1
35	178573	1	69	0	1	1	1
36	179522	1	32	0	1	1	0
37	183963	1	46	0	1	1	1
38	184167	1	45	0	1	1	0
39	193154	1	49	0	1	1	1
40	193040	1	55	0	1	1	0
41	196412	1	38	0	1	1	1
42	196577	1	73	0	1	1	1
43	196957	1	47	0	1	1	0
44	197356	1	43	0	1	1	1
45	197783	1	53	0	1	0	1
46	197951	1	50	0	1	1	0
47	198238	1	46	0	1	1	1
48	198160	1	49	0	1	1	0
49	198358	1	52	0	1	1	0
50	197236	1	56.6849	0	1	1	0
