# Supplementary material for: Identification and characterization of critical genes associated with tamoxifen resistance in breast cancer
Source: PeerJ journal article supplement (doi:10.7717/peerj.10468), 2020-12-04
Supplement: Raw_data.zip [file Table 4-IHC.docx]

| Nuclear HSPD1 staining  （tumor/non-tumor tissues） | | | Cytoplasmic HSPD1 staining  （tumor/non-tumor tissues） | | |
| --- | --- | --- | --- | --- | --- |
| SCORE | | %POSITIVE(n=50) | SCORE | | %POSITIVE(n=50) |
| mean | [range] | 92/22 | mean | [range] | 88/18 |
| 2.3/0.5 | 0-3 | 2.5/0.4 | 0-3 |

Summary of HSPD1 and HSPH1 scores in tumor tissues and non-tumor adjacent tissues (n=50) after tamoxifen treatment. Mean nuclear and cytoplasmic HSPD1 and HSPH1 scores (percentage of positive tumor cells and intensity of staining) determined by IHC. Magnifcation= 200×,100×

| Nuclear HSPH1 staining  （tumor/non-tumor tissues） | | | Cytoplasmic HSPH1 staining  （tumor/non-tumor tissues） | | |
| --- | --- | --- | --- | --- | --- |
| SCORE | | %POSITIVE(n=50) | SCORE | | %POSITIVE(n=50) |
| mean | [range] | 84/14 | mean | [range] | 80/24 |
| 2.1/0.4 | 0-3 | 2.0/0.6 | 0-3 |
