# Supplementary material for: Identification and characterization of critical genes associated with tamoxifen resistance in breast cancer
Source: PeerJ journal article supplement (doi:10.7717/peerj.10468), 2020-12-04
Supplement: STR_Identification_Results.pdf [file STR_Identification_Results.pdf]

# Report of Human Cell Line Authentication

Delivery Date: Apr.08<sup>th</sup>, 2019

Analysis Date: Apr.16<sup>th</sup>, 2019

## I . Sample

Sample Name: 'JD2923', labeled as 'MCF7', and was received on Apr.08<sup>th</sup>, 2019

## II . Method and Procedure

1. PCR is amplified with STR Multi-Amplification Kit (PowerPlex 21D System);
2. PCR products are assayed with 3100 DNA Analyzer (Applied Biosystems®).
3. Amplification of gene COX1 and electrophoresis are employed to survey the species of the sample.

## III. Results

1. The STR profiles of the cell line sample are in the attached table and figure.
2. The search result in ATCC and DSMZ databases.
3. The electrophoresis figure of gene COX1.

MCF7: ①No loci has tri-alleles or tetra-alleles. Contamination of other human cell lines are not found (Figure 1 & Table 1). ② Compared the STR data of MCF7 cell line in the databases of ATCC and DSMZ, all the alleles of MCF7 were exactly matched with the alleles of MCF-7 cell found in both cell banks (Figure 2&3). ③The sample is a human cell line. Contamination of other species cells are not found in the sample (Figure 4).

To all above, the sample is a single cell line, and it is MCF-7 cell line.

Operator: Wanting Jiang

Auditor: Xuanyi Liang

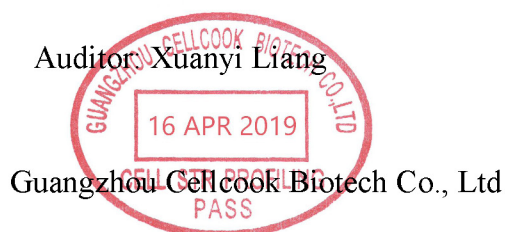

Figure 1. STR profiles of MCF7 cell line

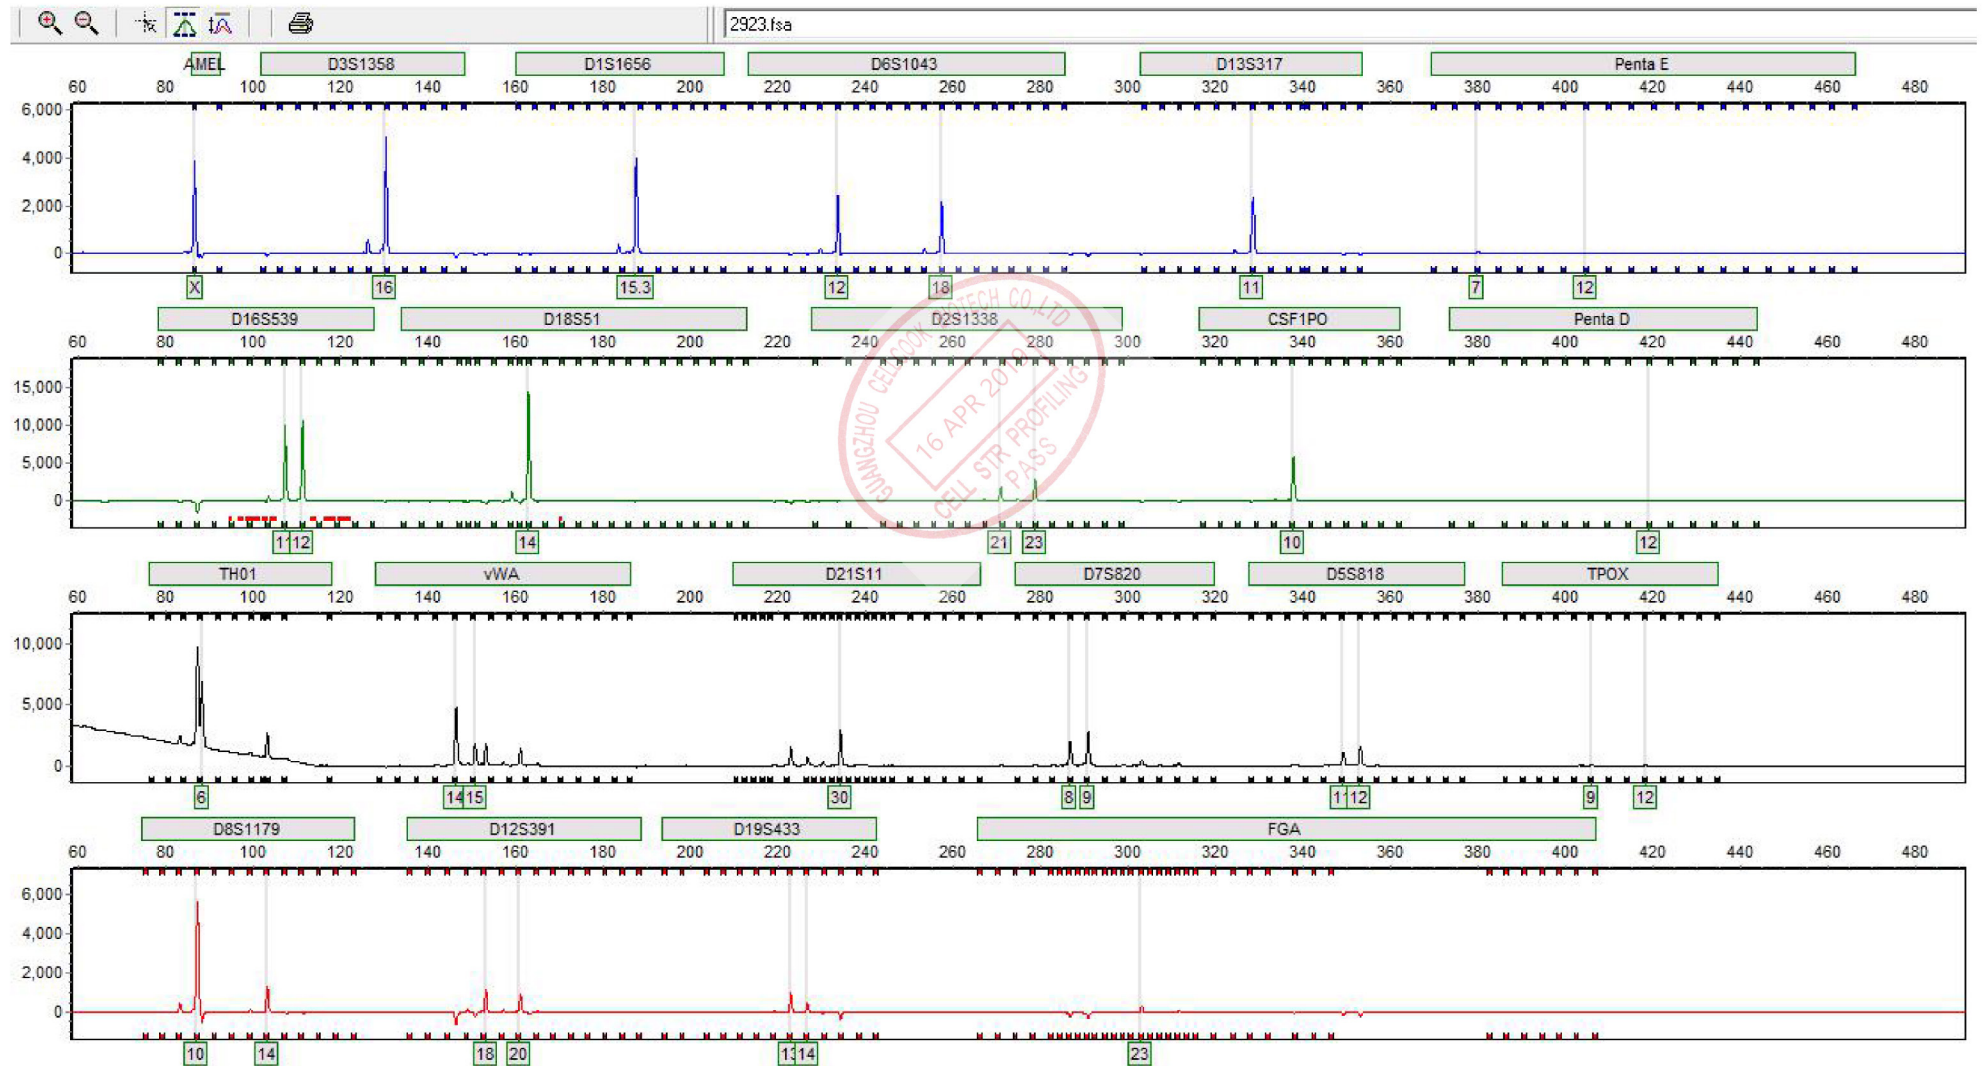

Table 1. STR profiles of MCF7 cell line

| 21      | Allele1 | Allele2 |
|---------|---------|---------|
| AMEL    | X       |         |
| D3S1358 | 16      |         |
| D1S1656 | 15.3    |         |
| D6S1043 | 12      | 18      |
| D13S317 | 11      |         |
| Penta E | 7       | 12      |
| D16S539 | 11      | 12      |
| D18S51  | 14      |         |
| D2S1338 | 21      | 23      |
| CSF1PO  | 10      |         |
| Penta D | 12      |         |
| TH01    | 6       |         |
| vWA     | 14      | 15      |
| D21S11  | 30      |         |
| D7S820  | 8       | 9       |
| D5S818  | 11      | 12      |
| TPOX    | 9       | 12      |
| D8S1179 | 10      | 14      |
| D12S391 | 18      | 20      |
| D19S433 | 13      | 14      |
| FGA     | 23      |         |

Figure 2. Search result in ATCC database

## SEARCH THE STR DATABASE

As part of our continuing efforts to characterize and authenticate the cell lines in the Cell Biology collection, ATCC has developed a comprehensive database of short tandem repeat (STR) DNA profiles for all of our human cell lines. [View our brief tutorial before starting.](#)

1. [STR Profiling Analysis](#)
2. [Matching Algorithm](#)
3. [Interrogating the Database](#)

Showing 1 - 57 Of 57

PageSize: 100 ▼

| Add to Cart                         | %Match | ATCC® Number | Designation                    | D5S818 | D13S317 | D7S820 | D16S539 | vWA   | TH01 | AMEL | TPOX | CSF1PO |
|-------------------------------------|--------|--------------|--------------------------------|--------|---------|--------|---------|-------|------|------|------|--------|
| <input checked="" type="checkbox"/> | 100.0  | HTB-22       | MCF7Breast AdenocarcinomaHuman | 11,12  | 11      | 8,9    | 11,12   | 14,15 | 6    | X    | 9,12 | 10     |
| <input checked="" type="checkbox"/> | 100.0  | HTB-22       | MCF7Breast AdenocarcinomaHuman | 11,12  | 11      | 8,9    | 11,12   | 14,15 | 6    | X    | 9,12 | 10     |
| <input checked="" type="checkbox"/> | 82.0   | CRL-5900     | NCI-H1869Lung CarcinomaHuman   | 11     | 11      | 8,9    | 12      | 16    | 6    | X    | 8,9  | 10     |

Figure 3. Search result in DSMZ database

| Result of STR matching analysis by your data.                 |          |           |             |         |        |         |       |      |     |      |        |         |
|---------------------------------------------------------------|----------|-----------|-------------|---------|--------|---------|-------|------|-----|------|--------|---------|
| - DSMZ Profile Database -                                     |          |           |             |         |        |         |       |      |     |      |        |         |
| A graphical presentation is shown at the bottom of this page. |          |           |             |         |        |         |       |      |     |      |        |         |
| EV                                                            | Cell No. | Cell name | Locus names |         |        |         |       |      |     |      |        | Figures |
|                                                               |          |           | D5S818      | D13S317 | D7S820 | D16S539 | VWA   | TH01 | AM  | TPOX | CSF1PO |         |
|                                                               |          |           | 11,12       | 11,11   | 8,9    | 11,12   | 14,15 | 6,6  | X,X | 9,12 | 10,10  |         |
| 1.00(36/36)                                                   | 115      | MCF-7     | 11,12       | 11,11   | 8,9    | 11,12   | 14,15 | 6,6  | X,X | 9,12 | 10,10  | -       |
| 1.00(36/36)                                                   | HTB-22   | MCF7      | 11,12       | 11,11   | 8,9    | 11,12   | 14,15 | 6,6  | X,X | 9,12 | 10,10  | -       |
| 1.00(36/36)                                                   | JCRB0134 | MCF-7     | 11,12       | 11,11   | 8,9    | 11,12   | 14,15 | 6,6  | X,X | 9,12 | 10,10  | -       |
| 1.00(36/36)                                                   | RCB1904  | MCF7      | 11,12       | 11,11   | 8,9    | 11,12   | 14,15 | 6,6  | X,X | 9,12 | 10,10  | -       |
| 0.94(34/36)                                                   | 317      | KPL-1     | 11,12       | 10,11   | 8,9    | 11,12   | 14,15 | 6,6  | X,X | 9,12 | 10,10  | -       |

Figure 4. Authentication of the species of the sample

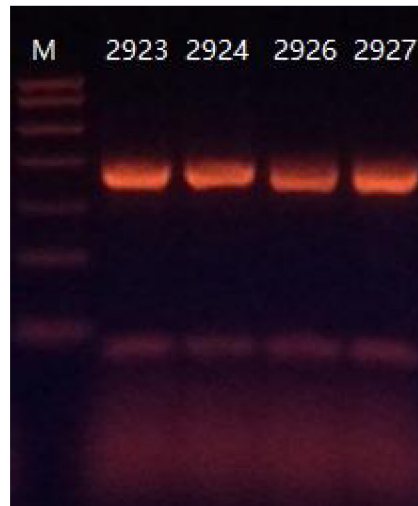

M: Marker. As the size of 700, 600, 500, 400, 300, 200 and 100bp from up to down.

Nine species are checked, as follow: *Homo sapiens* 391bp, *Cricetulus griseus* 315bp, *Macaca mulatta* 287bp, *Cercopithecus aethiops* 222bp, *Rattus norvegicus* 196bp, *Canis familiaris* 172bp, *Mus musculus* 150bp, *Bos Taurus* 102bp, IC 70bp

JD2923: The sample. The band size is 391bp which matches the size of human.
